# Supplementary material
Source: publisher site journal article supplement (https://www.spandidos-publications.com/7793/downloadSupplementary)
Supplement: Supplementary file 1 [file downloadSupplementary]

## Sheet: FIA-MS MRM
Table SII. Multiple reaction monitoring parameters for flow injection analysis-mass spectrometry analysis of lipids and related metabolites.
Database identifier	Chemical formula	Smiles	InChI	Metabolite identification	Metabolite class	Charge	Q1 (m/z)	Q3 (m/z)	Declustering potential (V)	Entrance potential (V)	Collision energy (V)	Collision cell exit potential (V)
LMSD:LMGP01050018; LMSD:LMGP01050074	C22H46NO7P	[H][C@@](CO[*])(COP([O-])(=O)OCC[N+](C)(C)C)O[*];[H][C@@](O)(COC(=O)CCCCCCCCCCCCC)COP([O-])(=O)OCC[N+](C)(C)C;	InChI=1S/C22H46NO7P/c1-5-6-7-8-9-10-11-12-13-14-15-16-22(25)28-19-21(24)20-30-31(26,27)29-18-17-23(2,3)4/h21,24H,5-20H2,1-4H3/t21-/m1/s1	lysoPC a C14:0	LPC	[M+H]+	468.3	184	79	10	30	15
LMSD:LMGP01050021; LMSD:LMGP01050022	C24H50NO7P	CCCCCCCCCCCCCCCC(=O)OC(CO)COP(O)(=O)OCC[N+](C)(C)C;[H][C@@](CO[*])(COP([O-])(=O)OCC[N+](C)(C)C)O[*];[H][C@@](O)(COC(=O)CCCCCCCCCCCCCCC)COP([O-])(=O)OCC[N+](C)(C)C	InChI=1S/C24H50NO7P/c1-5-6-7-8-9-10-11-12-13-14-15-16-17-18-24(27)30-21-23(26)22-32-33(28,29)31-20-19-25(2,3)4/h23,26H,5-22H2,1-4H3/t23-/m1/s1;InChI=1S/C24H50NO7P/c1-5-6-7-8-9-10-11-12-13-14-15-16-17-18-24(27)32-23(21-26)22-31-33(28,29)30-20-19-25(2,3)4/h23,26H,5-22H2,1-4H3/p+1	lysoPC a C16:0	LPC	[M+H]+	496.3	184	81	10	31	15
LMSD:LMGP01050024	C24H48NO7P	CCCCCC\C=C/CCCCCCCC(=O)OC[C@@]([H])(O)COP([O-])(=O)OCC[N+](C)(C)C;CCCCCC\C=C\CCCCCCCC(=O)OC[C@@H](O)COP([O-])(=O)OCC[N+](C)(C)C;[H][C@@](COC)(COP([O-])(=O)OCC[N+](C)(C)C)OC	InChI=1S/C24H48NO7P/c1-5-6-7-8-9-10-11-12-13-14-15-16-17-18-24(27)30-21-23(26)22-32-33(28,29)31-20-19-25(2,3)4/h10-11,23,26H,5-9,12-22H2,1-4H3/b11-10+/t23-/m1/s1;InChI=1S/C24H48NO7P/c1-5-6-7-8-9-10-11-12-13-14-15-16-17-18-24(27)30-21-23(26)22-32-33(28,29)31-20-19-25(2,3)4/h10-11,23,26H,5-9,12-22H2,1-4H3/b11-10-/t23-/m1/s1	lysoPC a C16:1	LPC	[M+H]+	494.3	184	79	10	30	15
LMSD:LMGP01050026; LMSD:LMGP01050076	C25H52NO7P	[H][C@@](CO[*])(COP([O-])(=O)OCC[N+](C)(C)C)O[*];[H][C@@](O)(COC(=O)CCCCCCCCCCCCCCCC)COP([O-])(=O)OCC[N+](C)(C)C;	InChI=1S/C25H52NO7P/c1-5-6-7-8-9-10-11-12-13-14-15-16-17-18-19-25(28)31-22-24(27)23-33-34(29,30)32-21-20-26(2,3)4/h24,27H,5-23H2,1-4H3/t24-/m1/s1	lysoPC a C17:0	LPC	[M+H]+	510.3	184	82	10	31	15
LMSD:LMGP01050032; LMSD:LMGP01050138	C26H54NO7P	[H][C@@](CO)(COP([O-])(=O)OCC[N+](C)(C)C)OC(=O)CCCCCCCCCCCCCCCCC;[H][C@@](COC)(COP([O-])(=O)OCC[N+](C)(C)C)OC;[H][C@@](O)(COC(=O)CCCCCCCCCCCCCCCCC)COP([O-])(=O)OCC[N+](C)(C)C	InChI=1S/C26H54NO7P/c1-5-6-7-8-9-10-11-12-13-14-15-16-17-18-19-20-26(29)32-23-25(28)24-34-35(30,31)33-22-21-27(2,3)4/h25,28H,5-24H2,1-4H3/t25-/m1/s1;InChI=1S/C26H54NO7P/c1-5-6-7-8-9-10-11-12-13-14-15-16-17-18-19-20-26(29)34-25(23-28)24-33-35(30,31)32-22-21-27(2,3)4/h25,28H,5-24H2,1-4H3/t25-/m1/s1	lysoPC a C18:0	LPC	[M+H]+	524.3	184	85	10	31	15
LMSD:LMGP01050035	C26H52NO7P	CCCCCCCC\C=C/CCCCCCCC(=O)OC(CO)COP(O)(=O)OCC[N+](C)(C)C;CCCCCCCC\C=C/CCCCCCCC(=O)OC[C@@]([H])(O)COP([O-])(=O)OCC[N+](C)(C)C;CCCCCC\C=C/CCCCCCCCCC(=O)OC[C@@]([H])(O)COP([O-])(=O)OCC[N+](C)(C)C;C[N+](C)(C)CCOP([O-])(=O)OC[C@@H](CO[*])O[*];[H][C@@](CO[*])(COP([O-])(=O)OCC[N+](C)(C)C)O[*];[H][C@@](O)(COC(=O)CCCCCCC\C=C\CCCCCCCC)COP([O-])(=O)OCC[N+](C)(C)C;	InChI=1S/C26H52NO7P/c1-5-6-7-8-9-10-11-12-13-14-15-16-17-18-19-20-26(29)32-23-25(28)24-34-35(30,31)33-22-21-27(2,3)4/h10-11,25,28H,5-9,12-24H2,1-4H3/b11-10-/t25-/m1/s1;InChI=1S/C26H52NO7P/c1-5-6-7-8-9-10-11-12-13-14-15-16-17-18-19-20-26(29)32-23-25(28)24-34-35(30,31)33-22-21-27(2,3)4/h12-13,25,28H,5-11,14-24H2,1-4H3/b13-12+/t25-/m1/s1;InChI=1S/C26H52NO7P/c1-5-6-7-8-9-10-11-12-13-14-15-16-17-18-19…	lysoPC a C18:1	LPC	[M+H]+	522.3	184	82	10	31	15
LMSD:LMGP01050133; LMSD:LMGP01050139	C26H50NO7P	CCCCCC\C=C/C\C=C/CCCCCCCC(=O)OC(CO)COP(O)(=O)OCC[N+](C)(C)C;CCCCC\C=C/C\C=C/CCCCCCCC(=O)OC[C@@]([H])(O)COP([O-])(=O)OCC[N+](C)(C)C;[H][C@@](COC)(COP([O-])(=O)OCC[N+](C)(C)C)OC	InChI=1S/C26H50NO7P/c1-5-6-7-8-9-10-11-12-13-14-15-16-17-18-19-20-26(29)32-23-25(28)24-34-35(30,31)33-22-21-27(2,3)4/h9-10,12-13,25,28H,5-8,11,14-24H2,1-4H3/b10-9-,13-12-/t25-/m1/s1;InChI=1S/C27H52NO7P/c1-5-6-7-8-9-10-11-12-13-14-15-16-17-18-19-20-21-27(30)35-26(24-29)25-34-36(31,32)33-23-22-28(2,3)4/h10-11,13-14,26,29H,5-9,12,15-25H2,1-4H3/p+1/b11-10-,14-13-	lysoPC a C18:2	LPC	[M+H]+	520.3	184	82	10	31	15
LMSD:LMGP01050048; LMSD:LMGP01050121; LMSD:LMGP01050140	C28H52NO7P	CCCCCCCC\C=C/C\C=C/C\C=C/CCCC(=O)OC[C@@]([H])(O)COP([O-])(=O)OCC[N+](C)(C)C;CCCCC\C=C/C\C=C/C\C=C/CCCCCCC(=O)OC[C@](O)([H])COP([O-])(=O)OCC[N+](C)(C)C;[H][C@@](COC(C)=O)(COP([O-])(=O)OCC[N+](C)(C)C)OC(C)=O;[H][C@@](O)(COC([*])=O)COP([O-])(=O)OCC[N+](C)(C)C;	InChI=1S/C28H52NO7P/c1-5-6-7-8-9-10-11-12-13-14-15-16-17-18-19-20-21-22-28(31)34-25-27(30)26-36-37(32,33)35-24-23-29(2,3)4/h12-13,15-16,18-19,27,30H,5-11,14,17,20-26H2,1-4H3/b13-12-,16-15-,19-18-/t27-/m1/s1;InChI=1S/C28H52NO7P/c1-5-6-7-8-9-10-11-12-13-14-15-16-17-18-19-20-21-22-28(31)34-25-27(30)26-36-37(32,33)35-24-23-29(2,3)4/h9-10,12-13,15-16,27,30H,5-8,11,14,17-26H2,1-4H3/b10-9-,13-12-,16-15-…	lysoPC a C20:3	LPC	[M+H]+	546.3	184	87	10	31	15
LMSD:LMGP01050057	C28H50NO7P	CCCCC\C=C/C\C=C/C\C=C/C\C=C/CCCC(=O)OC[C@](O)([H])COP([O-])(=O)OCC[N+](C)(C)C;CCCCC\C=C/C\C=C/C\C=C/C\C=C/CCCC(=O)O[C@H](CO)COP([O-])(=O)OCC[N+](C)(C)C;CC\C=C/C\C=C/C\C=C/C\C=C/CCCCCCC(=O)OC[C@](O)([H])COP([O-])(=O)OCC[N+](C)(C)C;[H][C@@](CO[*])(COP([O-])(=O)OCC[N+](C)(C)C)O[*];	InChI=1S/C28H50NO7P/c1-5-6-7-8-9-10-11-12-13-14-15-16-17-18-19-20-21-22-28(31)34-25-27(30)26-36-37(32,33)35-24-23-29(2,3)4/h6-7,9-10,12-13,15-16,27,30H,5,8,11,14,17-26H2,1-4H3/b7-6-,10-9-,13-12-,16-15-/t27-/m1/s1;InChI=1S/C28H50NO7P/c1-5-6-7-8-9-10-11-12-13-14-15-16-17-18-19-20-21-22-28(31)34-25-27(30)26-36-37(32,33)35-24-23-29(2,3)4/h9-10,12-13,15-16,18-19,27,30H,5-8,11,14,17,20-26H2,1-4H3/b10-9…	lysoPC a C20:4	LPC	[M+H]+	544.3	184	85	10	31	15
	C32H66NO7P	C[N+](C)(C)CCOP([O-])(=O)OC[C@@H](CO[*])O[*];[H][C@@](O)(COC(=O)CCCCCCCCCCCCCCCCCCCCCCC)COP([O-])(=O)OCC[N+](C)(C)C;	InChI=1S/C32H66NO7P/c1-5-6-7-8-9-10-11-12-13-14-15-16-17-18-19-20-21-22-23-24-25-26-32(35)38-29-31(34)30-40-41(36,37)39-28-27-33(2,3)4/h31,34H,5-30H2,1-4H3/t31-/m1/s1	lysoPC a C24:0	LPC	[M+H]+	608.4	184	96	10	33	15
	C34H70NO7P	C[N+](C)(C)CCOP([O-])(=O)OC[C@@H](CO[*])O[*];[H][C@@](O)(COC(=O)CCCCCCCCCCCCCCCCCCCCCCCCC)COP([O-])(=O)OCC[N+](C)(C)C;	InChI=1S/C34H70NO7P/c1-5-6-7-8-9-10-11-12-13-14-15-16-17-18-19-20-21-22-23-24-25-26-27-28-34(37)40-31-33(36)32-42-43(38,39)41-30-29-35(2,3)4/h33,36H,5-32H2,1-4H3/t33-/m1/s1	lysoPC a C26:0	LPC	[M+H]+	636.5	184	101	10	34	15
	C34H68NO7P	CCCCCCCCCCCCCCCCCCCC\C=C\CCCC(=O)OC[C@@H](O)COP([O-])(=O)OCC[N+](C)(C)C;C[N+](C)(C)CCOP([O-])(=O)OC[C@@H](CO[*])O[*];	InChI=1S/C34H68NO7P/c1-5-6-7-8-9-10-11-12-13-14-15-16-17-18-19-20-21-22-23-24-25-26-27-28-34(37)40-31-33(36)32-42-43(38,39)41-30-29-35(2,3)4/h24-25,33,36H,5-23,26-32H2,1-4H3/b25-24+/t33-/m1/s1	lysoPC a C26:1	LPC	[M+H]+	634.4	184	98	10	33	15
	C36H74NO7P	C[N+](C)(C)CCOP([O-])(=O)OC[C@@H](CO[*])O[*];[H][C@@](O)(COC(=O)CCCCCCCCCCCCCCCCCCCCCCCCCCC)COP([O-])(=O)OCC[N+](C)(C)C;	InChI=1S/C36H74NO7P/c1-5-6-7-8-9-10-11-12-13-14-15-16-17-18-19-20-21-22-23-24-25-26-27-28-29-30-36(39)42-33-35(38)34-44-45(40,41)43-32-31-37(2,3)4/h35,38H,5-34H2,1-4H3/t35-/m1/s1	lysoPC a C28:0	LPC	[M+H]+	664.5	184	105	10	35	15
LMSD:LMGP01010429	C36H72NO7P	CCCCCCCCCCCCCCCCCCCCCC\C=C\CCCC(=O)OC[C@@H](O)COP([O-])(=O)OCC[N+](C)(C)C;C[N+](C)(C)CCOP([O-])(=O)OC[C@@H](CO[*])O[*];	InChI=1S/C36H72NO7P/c1-5-6-7-8-9-10-11-12-13-14-15-16-17-18-19-20-21-22-23-24-25-26-27-28-29-30-36(39)42-33-35(38)34-44-45(40,41)43-32-31-37(2,3)4/h26-27,35,38H,5-25,28-34H2,1-4H3/b27-26+/t35-/m1/s1	lysoPC a C28:1	LPC	[M+H]+	662.5	184	103	10	35	15
	C32H64NO8P	CCCCCCCCCCCC(=O)OC[C@H](COP([O-])(=O)OCC[N+](C)(C)C)OC(=O)CCCCCCCCCCC;CCCCCCCCCCCCC(=O)OC[C@H](COP([O-])(=O)OCC[N+](C)(C)C)OC(=O)CCCCCCCCCC;CCCCCCCCCCCCC(=O)O[C@H](COC(=O)CCCCCCCCCC)COP([O-])(=O)OCC[N+](C)(C)C;CCCCCCCCCCCCCC(=O)OC[C@H](COP([O-])(=O)OCC[N+](C)(C)C)OC(=O)CCCCCCCCC;CCCCCCCCCCCCCCC(=O)O[C@H](COC(=O)CCCCCCCC)COP([O-])(=O)OCC[N+](C)(C)C;CCCCCCCCCCCCCCCC(=O)OC[C@H](COP([O-])(=O)OCC[N+](…	InChI=1S/C32H64NO8P/c1-6-8-10-12-13-14-15-16-17-18-19-21-22-24-31(34)38-28-30(41-32(35)25-23-20-11-9-7-2)29-40-42(36,37)39-27-26-33(3,4)5/h30H,6-29H2,1-5H3/t30-/m1/s1;InChI=1S/C32H64NO8P/c1-6-8-10-12-14-15-16-17-18-19-21-23-25-32(35)41-30(28-38-31(34)24-22-20-13-11-9-7-2)29-40-42(36,37)39-27-26-33(3,4)5/h30H,6-29H2,1-5H3/t30-/m1/s1;InChI=1S/C32H64NO8P/c1-6-8-10-12-14-15-16-17-19-20-22-24-31(34)38…	PC aa C24:0	PC	[M+H]+	622.4	184	98	10	33	15
LMSD:LMGP01010392; LMSD:LMGP01011364; LMSD:LMGP01011381	C34H68NO8P	CCCCCCCCCCCCCCCC(=O)OC[C@H](COP([O-])(=O)OCC[N+](C)(C)C)OC(=O)CCCCCCCCC;[C@](COC(=O)*)(OC(=O)*)([H])COP(OCC[N+](C)(C)C)(=O)[O-];	InChI=1S/C34H68NO8P/c1-6-8-10-12-14-15-16-17-18-19-21-22-24-26-33(36)40-30-32(31-42-44(38,39)41-29-28-35(3,4)5)43-34(37)27-25-23-20-13-11-9-7-2/h32H,6-31H2,1-5H3/t32-/m1/s1	PC aa C26:0	PC	[M+H]+	650.5	184	103	10	35	15
LMSD:LMGP01010481; LMSD:LMGP01010530; LMSD:LMGP01010560	C36H70NO8P	CCCCCCCCCC(=O)OC[C@H](COP([O-])(=O)OCC[N+](C)(C)C)OC(=O)CCCCCCC\C=C/CCCCCCCC;CCCCCCCCCCCCCC(=O)OC[C@]([H])(COP([O-])(=O)OCC[N+](C)(C)C)OC(=O)CCCCCCC\C=C/CCCC;CCCCCCCCCCCCCC(=O)O[C@]([H])(COC(=O)CCCCCCC\C=C/CCCC)COP([O-])(=O)OCC[N+](C)(C)C;[H][C@@](COC([*])=O)(COP([O-])(=O)OCC[N+](C)(C)C)OC([*])=O;	InChI=1S/C36H70NO8P/c1-6-8-10-12-14-15-16-17-18-19-20-21-23-25-27-29-36(39)45-34(33-44-46(40,41)43-31-30-37(3,4)5)32-42-35(38)28-26-24-22-13-11-9-7-2/h17-18,34H,6-16,19-33H2,1-5H3/b18-17-/t34-/m1/s1;InChI=1S/C36H70NO8P/c1-6-8-10-12-14-16-18-20-22-24-26-28-35(38)42-32-34(33-44-46(40,41)43-31-30-37(3,4)5)45-36(39)29-27-25-23-21-19-17-15-13-11-9-7-2/h12,14,34H,6-11,13,15-33H2,1-5H3/b14-12-/t34-/m1/s…	PC aa C28:1	PC	[M+H]+	676.5	184	106	10	35	15
LMSD:LMGP01011476	C38H76NO8P	[H][C@@](COC(=O)CCCCCCCCCCCCC)(COP([O-])(=O)OCC[N+](C)(C)C)OC(=O)CCCCCCCCCCCCCCC;[H][C@@](COC(=O)CCCCCCCCCCCCCC)(COP([O-])(=O)OCC[N+](C)(C)C)OC(=O)CCCCCCCCCCCCCC;[H][C@@](COC(=O)CCCCCCCCCCCCCCC)(COP([O-])(=O)OCC[N+](C)(C)C)OC(=O)CCCCCCCCCCCCC;[H][C@@](COC([*])=O)(COP([O-])(=O)OCC[N+](C)(C)C)OC([*])=O;	InChI=1S/C38H76NO8P/c1-6-8-10-12-14-16-18-19-21-22-24-26-28-30-37(40)44-34-36(35-46-48(42,43)45-33-32-39(3,4)5)47-38(41)31-29-27-25-23-20-17-15-13-11-9-7-2/h36H,6-35H2,1-5H3/t36-/m1/s1;InChI=1S/C38H76NO8P/c1-6-8-10-12-14-16-18-19-21-23-25-27-29-31-38(41)47-36(35-46-48(42,43)45-33-32-39(3,4)5)34-44-37(40)30-28-26-24-22-20-17-15-13-11-9-7-2/h36H,6-35H2,1-5H3/t36-/m1/s1;InChI=1S/C38H76NO8P/c1-6-8-10…	PC aa C30:0	PC	[M+H]+	706.5	184	114	10	37	15
LMSD:LMGP01010488; LMSD:LMGP01010564; LMSD:LMGP01010739	C38H72NO8P	CCCCCC\C=C/CCCCCCCC(=O)OC[C@]([H])(COP([O-])(=O)OCC[N+](C)(C)C)OC(=O)CCCCCCC\C=C/CCCC;[H][C@@](COC([*])=O)(COP([O-])(=O)OCC[N+](C)(C)C)OC([*])=O;	InChI=1S/C38H72NO8P/c1-6-8-10-12-14-16-18-19-21-22-24-26-28-30-37(40)44-34-36(35-46-48(42,43)45-33-32-39(3,4)5)47-38(41)31-29-27-25-23-20-17-15-13-11-9-7-2/h13,15-16,18,36H,6-12,14,17,19-35H2,1-5H3/b15-13-,18-16-/t36-/m1/s1	PC aa C30:2	PC	[M+H]+	702.5	184	111	10	37	15
LMSD:LMGP01010490; LMSD:LMGP01010492; LMSD:LMGP01010566; LMSD:LMGP01010882	C40H80NO8P	[H][C@@](COC(=O)CCCCCCCCCCCCC)(COP([O-])(=O)OCC[N+](C)(C)C)OC(=O)CCCCCCCCCCCCCCCCC;[H][C@@](COC(=O)CCCCCCCCCCCCCCC)(COP([O-])(=O)OCC[N+](C)(C)C)OC(=O)CCCCCCCCCCCCCCC;[H][C@@](COC(=O)CCCCCCCCCCCCCCCCC)(COP([O-])(=O)OCC[N+](C)(C)C)OC(=O)CCCCCCCCCCCCC;[H][C@@](COC([*])=O)(COP([O-])(=O)OCC[N+](C)(C)C)OC([*])=O;	InChI=1S/C40H80NO8P/c1-6-8-10-12-14-16-18-19-20-21-23-24-26-28-30-32-39(42)46-36-38(37-48-50(44,45)47-35-34-41(3,4)5)49-40(43)33-31-29-27-25-22-17-15-13-11-9-7-2/h38H,6-37H2,1-5H3/t38-/m1/s1;InChI=1S/C40H80NO8P/c1-6-8-10-12-14-16-18-19-20-21-23-25-27-29-31-33-40(43)49-38(37-48-50(44,45)47-35-34-41(3,4)5)36-46-39(42)32-30-28-26-24-22-17-15-13-11-9-7-2/h38H,6-37H2,1-5H3/t38-/m1/s1;InChI=1S/C40H80NO…	PC aa C32:0	PC	[M+H]+	734.6	184	119	10	39	15
LMSD:LMGP01010496; LMSD:LMGP01010684	C40H78NO8P	CCCCCCCCCCCCCC(=O)OC[C@]([H])(COP([O-])(=O)OCC[N+](C)(C)C)OC(=O)CCCCCCCCC\C=C/CCCCCC;CCCCCCCCCCCCCC(=O)OC[C@]([H])(COP([O-])(=O)OCC[N+](C)(C)C)OC(=O)CCCCCCC\C=C/CCCCCCCC;CCCCCCCCCCCCCC(=O)O[C@]([H])(COC(=O)CCCCCCC\C=C/CCCCCCCC)COP([O-])(=O)OCC[N+](C)(C)C;CCCCCCCCCCCCCCCC(=O)OC[C@]([H])(COP([O-])(=O)OCC[N+](C)(C)C)OC(=O)CCCCCCC\C=C/CCCCCC;[H][C@@](COC([*])=O)(COP([O-])(=O)OCC[N+](C)(C)C)OC([*])=O	InChI=1S/C40H78NO8P/c1-6-8-10-12-14-16-18-19-20-21-23-24-26-28-30-32-39(42)46-36-38(37-48-50(44,45)47-35-34-41(3,4)5)49-40(43)33-31-29-27-25-22-17-15-13-11-9-7-2/h19-20,38H,6-18,21-37H2,1-5H3/b20-19-/t38-/m1/s1;InChI=1S/C40H78NO8P/c1-6-8-10-12-14-16-18-19-20-21-23-25-27-29-31-33-40(43)49-38(37-48-50(44,45)47-35-34-41(3,4)5)36-46-39(42)32-30-28-26-24-22-17-15-13-11-9-7-2/h16,18,38H,6-15,17,19-37H2…	PC aa C32:1	PC	[M+H]+	732.6	184	118	10	39	15
LMSD:LMGP01010497	C40H76NO8P	CCCCCCCCCCCCCC(=O)OC[C@]([H])(COP([O-])(=O)OCC[N+](C)(C)C)OC(=O)CCCCCCC\C=C/C\C=C/CCCCC;CCCCCC\C=C/CCCCCCCC(=O)OC[C@]([H])(COP([O-])(=O)OCC[N+](C)(C)C)OC(=O)CCCCCCC\C=C/CCCCCC;[H][C@@](COC([*])=O)(COP([O-])(=O)OCC[N+](C)(C)C)OC([*])=O	InChI=1S/C40H76NO8P/c1-6-8-10-12-14-16-18-19-20-21-23-25-27-29-31-33-40(43)49-38(37-48-50(44,45)47-35-34-41(3,4)5)36-46-39(42)32-30-28-26-24-22-17-15-13-11-9-7-2/h14,16,19-20,38H,6-13,15,17-18,21-37H2,1-5H3/b16-14-,20-19-/t38-/m1/s1;InChI=1S/C40H76NO8P/c1-6-8-10-12-14-16-18-20-22-24-26-28-30-32-39(42)46-36-38(37-48-50(44,45)47-35-34-41(3,4)5)49-40(43)33-31-29-27-25-23-21-19-17-15-13-11-9-7-2/h16-…	PC aa C32:2	PC	[M+H]+	730.5	184	117	10	38	15
LMSD:LMGP01010005; LMSD:LMGP01010576; LMSD:LMGP01010744; LMSD:LMGP01010884; LMSD:LMGP01011483	C40H74NO8P	CCCCCCCCCCCCCC(=O)OC[C@]([H])(COP([O-])(=O)OCC[N+](C)(C)C)OC(=O)CCCCCCC\C=C/C\C=C/C\C=C/CC;[C@](COC(=O)*)(OC(=O)*)([H])COP(OCC[N+](C)(C)C)(=O)[O-];	InChI=1S/C40H74NO8P/c1-6-8-10-12-14-16-18-19-20-21-23-25-27-29-31-33-40(43)49-38(37-48-50(44,45)47-35-34-41(3,4)5)36-46-39(42)32-30-28-26-24-22-17-15-13-11-9-7-2/h8,10,14,16,19-20,38H,6-7,9,11-13,15,17-18,21-37H2,1-5H3/b10-8-,16-14-,20-19-/t38-/m1/s1	PC aa C32:3	PC	[M+H]+	728.5	184	117	10	38	15
LMSD:LMGP01010594; LMSD:LMGP01010678; LMSD:LMGP01010687; LMSD:LMGP01010688; LMSD:LMGP01010887; LMSD:LMGP01010932	C42H82NO8P	CCCCCCCCCCCCCCCC(=O)OC[C@]([H])(COP([O-])(=O)OCC[N+](C)(C)C)OC(=O)CCCCCCCCC\C=C/CCCCCC;CCCCCCCCCCCCCCCC(=O)OC[C@]([H])(COP([O-])(=O)OCC[N+](C)(C)C)OC(=O)CCCCCCC\C=C/CCCCCCCC;CCCCCCCCCCCCCCCC(=O)O[C@]([H])(COC(=O)CCCCCCC\C=C/CCCCCCCC)COP([O-])(=O)OCC[N+](C)(C)C;CCCCCCCCCCCCCCCCCC(=O)OC[C@]([H])(COP([O-])(=O)OCC[N+](C)(C)C)OC(=O)CCCCCCC\C=C/CCCCCC;CCCCCCCCCCCCCCCCCC(=O)O[C@]([H])(COC(=O)CCCCCCC\C=C…	InChI=1S/C42H82NO8P/c1-6-8-10-12-14-16-18-20-21-23-24-26-28-30-32-34-41(44)48-38-40(39-50-52(46,47)49-37-36-43(3,4)5)51-42(45)35-33-31-29-27-25-22-19-17-15-13-11-9-7-2/h17,19,40H,6-16,18,20-39H2,1-5H3/b19-17-/t40-/m1/s1;InChI=1S/C42H82NO8P/c1-6-8-10-12-14-16-18-20-21-23-24-26-28-30-32-34-41(44)48-38-40(39-50-52(46,47)49-37-36-43(3,4)5)51-42(45)35-33-31-29-27-25-22-19-17-15-13-11-9-7-2/h20-21,40H,…	PC aa C34:1	PC	[M+H]+	760.6	184	125	10	41	15
LMSD:LMGP01010598; LMSD:LMGP01010601; LMSD:LMGP01010690	C42H80NO8P	CCCCCCCCCCCCCCCC(=O)OC[C@H](COP([O-])(=O)OCC[N+](C)(C)C)OC([*])=O;CCCCCCCCCCCCCCCC(=O)OC[C@]([H])(COP([O-])(=O)OCC[N+](C)(C)C)OC(=O)CCCCCCC\C=C/C\C=C/CCCCC;CCCCCCCCCCCCCCCC(=O)O[C@]([H])(COC(=O)CCCCCCC\C=C/C\C=C/CCCCC)COP([O-])(=O)OCC[N+](C)(C)C;CCCCCCCCCCCCC\C=C/C(=O)OC[C@H](COP([O-])(=O)OCC[N+](C)(C)C)OC(=O)CCCCCCC\C=C/CCCCCCCC;CCCCCCCC\C=C/CCCCCCCC(=O)OC[C@]([H])(COP([O-])(=O)OCC[N+](C)(C)C)OC…	InChI=1S/C42H80NO8P/c1-6-8-10-12-14-16-18-20-21-23-24-26-28-30-32-34-41(44)48-38-40(39-50-52(46,47)49-37-36-43(3,4)5)51-42(45)35-33-31-29-27-25-22-19-17-15-13-11-9-7-2/h14,16,20-21,40H,6-13,15,17-19,22-39H2,1-5H3/b16-14-,21-20-/t40-/m1/s1;InChI=1S/C42H80NO8P/c1-6-8-10-12-14-16-18-20-21-23-24-26-28-30-32-34-41(44)48-38-40(39-50-52(46,47)49-37-36-43(3,4)5)51-42(45)35-33-31-29-27-25-22-19-17-15-13-1…	PC aa C34:2	PC	[M+H]+	758.6	184	123	10	40	15
LMSD:LMGP01010506; LMSD:LMGP01010603	C42H78NO8P	CCCCCCCCCCCCCCCC(=O)OC[C@]([H])(COP([O-])(=O)OCC[N+](C)(C)C)OC(=O)CCCCCCC\C=C/C\C=C/C\C=C/CC;CCCCCCCCCCCCCCCC(=O)OC[C@]([H])(COP([O-])(=O)OCC[N+](C)(C)C)OC(=O)CCCC\C=C/C\C=C/C\C=C/CCCCC;CCCCCC\C=C/CCCCCCCC(=O)OC[C@]([H])(COP([O-])(=O)OCC[N+](C)(C)C)OC(=O)CCCCCCC\C=C/C\C=C/CCCCC;[H][C@@](COC([*])=O)(COP([O-])(=O)OCC[N+](C)(C)C)OC([*])=O;	InChI=1S/C42H78NO8P/c1-6-8-10-12-14-16-18-20-21-23-25-27-29-31-33-35-42(45)51-40(39-50-52(46,47)49-37-36-43(3,4)5)38-48-41(44)34-32-30-28-26-24-22-19-17-15-13-11-9-7-2/h14,16,20-21,25,27,40H,6-13,15,17-19,22-24,26,28-39H2,1-5H3/b16-14-,21-20-,27-25-/t40-/m1/s1;InChI=1S/C42H78NO8P/c1-6-8-10-12-14-16-18-20-21-23-25-27-29-31-33-35-42(45)51-40(39-50-52(46,47)49-37-36-43(3,4)5)38-48-41(44)34-32-30-28-…	PC aa C34:3	PC	[M+H]+	756.6	184	123	10	40	15
LMSD:LMGP01010006; LMSD:LMGP01010511; LMSD:LMGP01011002; LMSD:LMGP01011085	C42H76NO8P	CCCCCCCCCCCCCC(=O)OC[C@]([H])(COP([O-])(=O)OCC[N+](C)(C)C)OC(=O)CCC\C=C/C\C=C/C\C=C/C\C=C/CCCCC;CCCCCCCCCCCCCCCC(=O)OC[C@]([H])(COP([O-])(=O)OCC[N+](C)(C)C)OC(=O)CCCC\C=C/C\C=C/C\C=C/C\C=C/CC;[H][C@@](COC([*])=O)(COP([O-])(=O)OCC[N+](C)(C)C)OC([*])=O	InChI=1S/C42H76NO8P/c1-6-8-10-12-14-16-18-19-20-21-22-23-25-27-29-31-33-35-42(45)51-40(39-50-52(46,47)49-37-36-43(3,4)5)38-48-41(44)34-32-30-28-26-24-17-15-13-11-9-7-2/h14,16,19-20,22-23,27,29,40H,6-13,15,17-18,21,24-26,28,30-39H2,1-5H3/b16-14-,20-19-,23-22-,29-27-/t40-/m1/s1;InChI=1S/C42H76NO8P/c1-6-8-10-12-14-16-18-20-21-23-25-27-29-31-33-35-42(45)51-40(39-50-52(46,47)49-37-36-43(3,4)5)38-48-41…	PC aa C34:4	PC	[M+H]+	754.5	184	122	10	40	15
LMSD:LMGP01010761; LMSD:LMGP01010840; LMSD:LMGP01010888; LMSD:LMGP01011468	C44H88NO8P	[C@](COC(=O)*)(OC(=O)*)([H])COP(OCC[N+](C)(C)C)(=O)[O-];[H][C@@](COC(=O)CCCCCCCCCCCCC)(COP([O-])(=O)OCC[N+](C)(C)C)OC(=O)CCCCCCCCCCCCCCCCCCCCC;[H][C@@](COC(=O)CCCCCCCCCCCCCCCCC)(COP([O-])(=O)OCC[N+](C)(C)C)OC(=O)CCCCCCCCCCCCCCCCC;[H][C@@](COC(=O)CCCCCCCCCCCCCCCCCCC)(COP([O-])(=O)OCC[N+](C)(C)C)OC(=O)CCCCCCCCCCCCCCC;[H][C@@](COC(=O)CCCCCCCCCCCCCCCCCCCCC)(COP([O-])(=O)OCC[N+](C)(C)C)OC(=O)CCCCCCCCC…	InChI=1S/C44H88NO8P/c1-6-8-10-12-14-16-18-19-20-21-22-23-24-25-27-28-30-32-34-36-43(46)50-40-42(41-52-54(48,49)51-39-38-45(3,4)5)53-44(47)37-35-33-31-29-26-17-15-13-11-9-7-2/h42H,6-41H2,1-5H3/t42-/m1/s1;InChI=1S/C44H88NO8P/c1-6-8-10-12-14-16-18-19-20-21-22-23-24-25-27-29-31-33-35-37-44(47)53-42(41-52-54(48,49)51-39-38-45(3,4)5)40-50-43(46)36-34-32-30-28-26-17-15-13-11-9-7-2/h42H,6-41H2,1-5H3/t42-…	PC aa C36:0	PC	[M+H]+	790.6	184	131	10	43	15
LMSD:LMGP01010764; LMSD:LMGP01010765; LMSD:LMGP01010766; LMSD:LMGP01010768; LMSD:LMGP01010841; LMSD:LMGP01010890; LMSD:LMGP01010935; LMSD:LMGP01011469	C44H86NO8P	CCCCCCCCCCCCCCCC(=O)OC[C@]([H])(COP([O-])(=O)OCC[N+](C)(C)C)OC(=O)CCCCCCCCC\C=C/CCCCCCCC;CCCCCCCCCCCCCCCCCC(=O)OC[C@]([H])(COP([O-])(=O)OCC[N+](C)(C)C)OC(=O)CCCCCCC\C=C/CCCCCCCC;CCCCCCCCCCCCCCCCCC(=O)O[C@]([H])(COC(=O)CCCCCCCCC\C=C/CCCCCC)COP([O-])(=O)OCC[N+](C)(C)C;CCCCCCCCCCCCCCCCCC(=O)O[C@]([H])(COC(=O)CCCCCCC\C=C/CCCCCCCC)COP([O-])(=O)OCC[N+](C)(C)C;C[N+](C)(C)CCOP([O-])(=O)OC[C@@H](COC([*])=…	InChI=1S/C44H86NO8P/c1-6-8-10-12-14-16-18-20-21-22-23-25-27-29-31-33-35-37-44(47)53-42(41-52-54(48,49)51-39-38-45(3,4)5)40-50-43(46)36-34-32-30-28-26-24-19-17-15-13-11-9-7-2/h20-21,42H,6-19,22-41H2,1-5H3/b21-20-/t42-/m1/s1;InChI=1S/C44H86NO8P/c1-6-8-10-12-14-16-18-20-22-24-26-28-30-32-34-36-43(46)50-40-42(41-52-54(48,49)51-39-38-45(3,4)5)53-44(47)37-35-33-31-29-27-25-23-21-19-17-15-13-11-9-7-2/h1…	PC aa C36:1	PC	[M+H]+	788.6	184	131	10	43	15
LMSD:LMGP01010622; LMSD:LMGP01010627; LMSD:LMGP01010893; LMSD:LMGP01010895; LMSD:LMGP01011588	C44H84NO8P	CCCCCCCCCCCCCCCC(=O)OC[C@]([H])(COP([O-])(=O)OCC[N+](C)(C)C)OC(=O)CCCCCCCCC\C=C/C\C=C/CCCCC;CCCCCCCCCCCCCCCCCC(=O)OC[C@H](COP([O-])(=O)OCC[N+](C)(C)C)OC(=O)CCCCCCCC\C=C/C=C\CCCCC;CCCCCCCCCCCCCCCCCC(=O)OC[C@H](COP([O-])(=O)OCC[N+](C)(C)C)OC(=O)CCCC\C=C/C\C=C/CCCCCCCC;CCCCCCCCCCCCCCCCCC(=O)OC[C@H](COP([O-])(=O)OCC[N+](C)(C)C)OC(=O)\C=C\C=C\CCCCCCCCCCCCC;CCCCCCCCCCCCCCCCCC(=O)OC[C@]([H])(COP([O-])(=…	InChI=1S/C44H84NO8P/c1-6-8-10-12-14-16-18-20-21-22-23-25-27-29-31-33-35-37-44(47)53-42(41-52-54(48,49)51-39-38-45(3,4)5)40-50-43(46)36-34-32-30-28-26-24-19-17-15-13-11-9-7-2/h14,16,20-21,42H,6-13,15,17-19,22-41H2,1-5H3/b16-14-,21-20-/t42-/m1/s1;InChI=1S/C44H84NO8P/c1-6-8-10-12-14-16-18-20-22-24-26-28-30-32-34-36-43(46)50-40-42(41-52-54(48,49)51-39-38-45(3,4)5)53-44(47)37-35-33-31-29-27-25-23-21-1…	PC aa C36:2	PC	[M+H]+	786.6	184	130	10	42	15
LMSD:LMGP01010007; LMSD:LMGP01010629; LMSD:LMGP01010773; LMSD:LMGP01010898; LMSD:LMGP01010937; LMSD:LMGP01010955; LMSD:LMGP01011049; LMSD:LMGP01011603; LMSD:LMGP01011652; LMSD:LMGP01011711	C44H82NO8P	CCCCCCCCCCCCCCCC(=O)OC[C@]([H])(COP([O-])(=O)OCC[N+](C)(C)C)OC(=O)CCCCCC\C=C/C\C=C/C\C=C/CCCCC;CCCCCCCCCCCCCCCC(=O)OC[C@]([H])(COP([O-])(=O)OCC[N+](C)(C)C)OC(=O)CCC\C=C/C\C=C/C\C=C/CCCCCCCC;CCCCCCCCCCCCCCCCCC(=O)OC[C@]([H])(COP([O-])(=O)OCC[N+](C)(C)C)OC(=O)CCCC\C=C/C\C=C/C\C=C/CCCCC;CCCCCCCC\C=C/CCCCCCCC(=O)OC[C@H](COP([O-])(=O)OCC[N+](C)(C)C)OC(=O)CCCC\C=C/C\C=C/CCCCCCCC;CCCCCCCC\C=C/CCCCCCCC(=…	InChI=1S/C44H82NO8P/c1-6-8-10-12-14-16-18-20-21-22-23-25-27-29-31-33-35-37-44(47)53-42(41-52-54(48,49)51-39-38-45(3,4)5)40-50-43(46)36-34-32-30-28-26-24-19-17-15-13-11-9-7-2/h14,16,20-21,23,25,42H,6-13,15,17-19,22,24,26-41H2,1-5H3/b16-14-,21-20-,25-23-/t42-/m1/s1;InChI=1S/C44H82NO8P/c1-6-8-10-12-14-16-18-20-21-22-23-25-27-29-31-33-35-37-44(47)53-42(41-52-54(48,49)51-39-38-45(3,4)5)40-50-43(46)36-…	PC aa C36:3	PC	[M+H]+	784.6	184	130	10	42	15
LMSD:LMGP01010633; LMSD:LMGP01010695; LMSD:LMGP01011305	C44H80NO8P	CCCCCCCCCCCCCCCC(=O)OC[C@H](COP([O-])(=O)OCC[N+](C)(C)C)OC(=O)CCC\C=C\C\C=C\C\C=C\C\C=C\CCCCC;CCCCCCCCCCCCCCCC(=O)OC[C@]([H])(COP([O-])(=O)OCC[N+](C)(C)C)OC(=O)CCC\C=C/C\C=C/C\C=C/C\C=C/CCCCC;CCCCCCCCCCCCCCCC(=O)O[C@]([H])(COC(=O)CCC\C=C/C\C=C/C\C=C/C\C=C/CCCCC)COP([O-])(=O)OCC[N+](C)(C)C;CCCCCCCCCCCCCCCCCC(=O)OC[C@]([H])(COP([O-])(=O)OCC[N+](C)(C)C)OC(=O)CCCC\C=C/C\C=C/C\C=C/C\C=C/CC;CCCCCCCCCCC…	InChI=1S/C44H80NO8P/c1-6-8-10-12-14-16-18-20-21-22-23-25-26-28-30-32-34-36-43(46)50-40-42(41-52-54(48,49)51-39-38-45(3,4)5)53-44(47)37-35-33-31-29-27-24-19-17-15-13-11-9-7-2/h14,16,20-21,23,25,28,30,42H,6-13,15,17-19,22,24,26-27,29,31-41H2,1-5H3/b16-14-,21-20-,25-23-,30-28-/t42-/m1/s1;InChI=1S/C44H80NO8P/c1-6-8-10-12-14-16-18-20-21-22-23-25-27-29-31-33-35-37-44(47)53-42(41-52-54(48,49)51-39-38-45…	PC aa C36:4	PC	[M+H]+	782.6	184	129	10	42	15
LMSD:LMGP01010512; LMSD:LMGP01010956	C44H78NO8P	CCCCCCCCCCCCCCCC(=O)OC[C@]([H])(COP([O-])(=O)OCC[N+](C)(C)C)OC(=O)CCC\C=C/C\C=C/C\C=C/C\C=C/C\C=C/CC;CCCCCC\C=C/CCCCCCCC(=O)OC[C@]([H])(COP([O-])(=O)OCC[N+](C)(C)C)OC(=O)CCC\C=C/C\C=C/C\C=C/C\C=C/CCCCC;[H][C@@](COC(=O)CCCCC\C=C/CCCCCCCC)(COP([O-])(=O)OCC[N+](C)(C)C)OC(=O)CCC\C=C/C\C=C/C\C=C/C\C=C/CCCCC;[H][C@@](COC(C)=O)(COP([O-])(=O)OCC[N+](C)(C)C)OC(C)=O;	InChI=1S/C44H78NO8P/c1-6-8-10-12-14-16-18-20-21-22-23-25-27-29-31-33-35-37-44(47)53-42(41-52-54(48,49)51-39-38-45(3,4)5)40-50-43(46)36-34-32-30-28-26-24-19-17-15-13-11-9-7-2/h14,16,20-21,23-26,29,31,42H,6-13,15,17-19,22,27-28,30,32-41H2,1-5H3/b16-14-,21-20-,25-23-,26-24-,31-29-/t42-/m1/s1;InChI=1S/C44H78NO8P/c1-6-8-10-12-14-16-18-20-21-22-23-25-27-29-31-33-35-37-44(47)53-42(41-52-54(48,49)51-39-3…	PC aa C36:5	PC	[M+H]+	780.6	184	128	10	42	15
LMSD:LMGP01010515; LMSD:LMGP01010636; LMSD:LMGP01010781; LMSD:LMGP01011004; LMSD:LMGP01011983	C44H76NO8P	CCCCCCCCCCCCCC(=O)OC[C@]([H])(COP([O-])(=O)OCC[N+](C)(C)C)OC(=O)CC\C=C/C\C=C/C\C=C/C\C=C/C\C=C/C\C=C/CC;CC\C=C/C\C=C/C\C=C/CCCCCCCC(=O)OC[C@]([H])(COP([O-])(=O)OCC[N+](C)(C)C)OC(=O)CCCCCCC\C=C/C\C=C/C\C=C/CC;	InChI=1S/C44H76NO8P/c1-6-8-10-12-14-16-18-19-20-21-22-23-24-25-27-29-31-33-35-37-44(47)53-42(41-52-54(48,49)51-39-38-45(3,4)5)40-50-43(46)36-34-32-30-28-26-17-15-13-11-9-7-2/h8,10,14,16,19-20,22-23,25,27,31,33,42H,6-7,9,11-13,15,17-18,21,24,26,28-30,32,34-41H2,1-5H3/b10-8-,16-14-,20-19-,23-22-,27-25-,33-31-/t42-/m1/s1;InChI=1S/C44H76NO8P/c1-6-8-10-12-14-16-18-20-22-24-26-28-30-32-34-36-43(46)50-4…	PC aa C36:6	PC	[M+H]+	778.5	184	128	10	42	15
LMSD:LMGP01010516; LMSD:LMGP01010638; LMSD:LMGP01010783; LMSD:LMGP01010902; LMSD:LMGP01011005; LMSD:LMGP01011010	C46H92NO8P	[C@](COC(=O)*)(OC(=O)*)([H])COP(OCC[N+](C)(C)C)(=O)[O-];[H][C@@](COC(=O)CCCCCCCCCCCCC)(COP([O-])(=O)OCC[N+](C)(C)C)OC(=O)CCCCCCCCCCCCCCCCCCCCCCC;[H][C@@](COC(=O)CCCCCCCCCCCCCCC)(COP([O-])(=O)OCC[N+](C)(C)C)OC(=O)CCCCCCCCCCCCCCCCCCCCC;[H][C@@](COC(=O)CCCCCCCCCCCCCCCCC)(COP([O-])(=O)OCC[N+](C)(C)C)OC(=O)CCCCCCCCCCCCCCCCCCC;[H][C@@](COC(=O)CCCCCCCCCCCCCCCCCCC)(COP([O-])(=O)OCC[N+](C)(C)C)OC(=O)CCCCC…	InChI=1S/C46H92NO8P/c1-6-8-10-12-14-16-18-19-20-21-22-23-24-25-26-27-29-30-32-34-36-38-45(48)52-42-44(43-54-56(50,51)53-41-40-47(3,4)5)55-46(49)39-37-35-33-31-28-17-15-13-11-9-7-2/h44H,6-43H2,1-5H3/t44-/m1/s1;InChI=1S/C46H92NO8P/c1-6-8-10-12-14-16-18-19-20-21-22-23-24-25-26-27-29-31-33-35-37-39-46(49)55-44(43-54-56(50,51)53-41-40-47(3,4)5)42-52-45(48)38-36-34-32-30-28-17-15-13-11-9-7-2/h44H,6-43H…	PC aa C38:0	PC	[M+H]+	818.7	184	138	10	45	15
LMSD:LMGP01010796; LMSD:LMGP01010799; LMSD:LMGP01011496	C46H90NO8P	CCCCCCCCCCCCCC(=O)OC[C@]([H])(COP([O-])(=O)OCC[N+](C)(C)C)OC(=O)CCCCCCCCCCCCC\C=C/CCCCCCCC;CCCCCCCCCCCCCCCC(=O)OC[C@]([H])(COP([O-])(=O)OCC[N+](C)(C)C)OC(=O)CCCCCCCCCCC\C=C/CCCCCCCC;CCCCCCCCCCCCCCCCCC(=O)OC[C@]([H])(COP([O-])(=O)OCC[N+](C)(C)C)OC(=O)CCCCCCCCC\C=C/CCCCCCCC;CCCCCCCCCCCCCCCCCCCC(=O)OC[C@]([H])(COP([O-])(=O)OCC[N+](C)(C)C)OC(=O)CCCCCCCCC\C=C/CCCCCC;CCCCCCCCCCCCCCCCCCCC(=O)OC[C@]([H])…	InChI=1S/C46H90NO8P/c1-6-8-10-12-14-16-18-19-20-21-22-23-24-25-26-27-29-31-33-35-37-39-46(49)55-44(43-54-56(50,51)53-41-40-47(3,4)5)42-52-45(48)38-36-34-32-30-28-17-15-13-11-9-7-2/h19-20,44H,6-18,21-43H2,1-5H3/b20-19-/t44-/m1/s1;InChI=1S/C46H90NO8P/c1-6-8-10-12-14-16-18-20-21-22-23-24-25-27-29-31-33-35-37-39-46(49)55-44(43-54-56(50,51)53-41-40-47(3,4)5)42-52-45(48)38-36-34-32-30-28-26-19-17-15-13…	PC aa C38:1	PC	[M+H]+	816.7	184	138	10	45	15
LMSD:LMGP01010642; LMSD:LMGP01010802; LMSD:LMGP01010804; LMSD:LMGP01010904; LMSD:LMGP01011609	C46H86NO8P	CCCCCCCCCCCCCCCCCC(=O)OC[C@]([H])(COP([O-])(=O)OCC[N+](C)(C)C)OC(=O)CCCCCC\C=C/C\C=C/C\C=C/CCCCC;CCCCCCCCCCCCCCCCCC(=O)OC[C@]([H])(COP([O-])(=O)OCC[N+](C)(C)C)OC(=O)CCC\C=C/C\C=C/C\C=C/CCCCCCCC;CCCCCC\C=C/CCCCCCCC(=O)OC[C@]([H])(COP([O-])(=O)OCC[N+](C)(C)C)OC(=O)CCCCCCCCCCC\C=C/C\C=C/CCCCC;[H][C@@](COC(C)=O)(COP([O-])(=O)OCC[N+](C)(C)C)OC(C)=O;	InChI=1S/C46H86NO8P/c1-6-8-10-12-14-16-18-20-21-22-23-24-25-27-29-31-33-35-37-39-46(49)55-44(43-54-56(50,51)53-41-40-47(3,4)5)42-52-45(48)38-36-34-32-30-28-26-19-17-15-13-11-9-7-2/h14,16-17,19-21,44H,6-13,15,18,22-43H2,1-5H3/b16-14-,19-17-,21-20-/t44-/m1/s1;InChI=1S/C46H86NO8P/c1-6-8-10-12-14-16-18-20-22-23-25-27-29-31-33-35-37-39-46(49)55-44(43-54-56(50,51)53-41-40-47(3,4)5)42-52-45(48)38-36-34-…	PC aa C38:3	PC	[M+H]+	812.6	184	136	10	44	15
LMSD:LMGP01010645; LMSD:LMGP01010647; LMSD:LMGP01010805; LMSD:LMGP01010905	C46H84NO8P	CCCCCCCCCCCCCCCC(=O)OC[C@]([H])(COP([O-])(=O)OCC[N+](C)(C)C)OC(=O)CCCCC\C=C/C\C=C/C\C=C/C\C=C/CCCCC;CCCCCCCCCCCCCCCCCC(=O)OC[C@H](COP([O-])(=O)OCC[N+](C)(C)C)OC(=O)CCCCCC\C=C/C=C\C=C/C=C\CCCCC;CCCCCCCCCCCCCCCCCC(=O)OC[C@]([H])(COP([O-])(=O)OCC[N+](C)(C)C)OC(=O)CCC\C=C/C\C=C/C\C=C/C\C=C/CCCCC;CCCCCCCC\C=C/CCCCCCCC(=O)OC[C@]([H])(COP([O-])(=O)OCC[N+](C)(C)C)OC(=O)CCCCCC\C=C/C\C=C/C\C=C/CCCCC;CCCCCC…	InChI=1S/C46H84NO8P/c1-6-8-10-12-14-16-18-20-21-22-23-24-25-27-29-31-33-35-37-39-46(49)55-44(43-54-56(50,51)53-41-40-47(3,4)5)42-52-45(48)38-36-34-32-30-28-26-19-17-15-13-11-9-7-2/h14,16,20-21,23-24,27,29,44H,6-13,15,17-19,22,25-26,28,30-43H2,1-5H3/b16-14-,21-20-,24-23-,29-27-/t44-/m1/s1;InChI=1S/C46H84NO8P/c1-6-8-10-12-14-16-18-20-22-23-25-27-29-31-33-35-37-39-46(49)55-44(43-54-56(50,51)53-41-40…	PC aa C38:4	PC	[M+H]+	810.6	184	136	10	44	15
LMSD:LMGP01010650; LMSD:LMGP01010844; LMSD:LMGP01010907; LMSD:LMGP01010943; LMSD:LMGP01011057; LMSD:LMGP01011116; LMSD:LMGP01011909; LMSD:LMGP01012137	C46H82NO8P	CCCCCCCCCCCCCCCC(=O)OC[C@]([H])(COP([O-])(=O)OCC[N+](C)(C)C)OC(=O)CCCCC\C=C/C\C=C/C\C=C/C\C=C/C\C=C/CC;CCCCCCCCCCCCCCCC(=O)OC[C@]([H])(COP([O-])(=O)OCC[N+](C)(C)C)OC(=O)CC\C=C/C\C=C/C\C=C/C\C=C/C\C=C/CCCCC;CCCCCCCCCCCCCCCCCC(=O)OC[C@]([H])(COP([O-])(=O)OCC[N+](C)(C)C)OC(=O)CCC\C=C/C\C=C/C\C=C/C\C=C/C\C=C/CC;CCCCCCCC\C=C/CCCCCCCC(=O)OC[C@]([H])(COP([O-])(=O)OCC[N+](C)(C)C)OC(=O)CCC\C=C/C\C=C/C\C=C…	InChI=1S/C46H82NO8P/c1-6-8-10-12-14-16-18-20-21-22-23-24-25-27-29-31-33-35-37-39-46(49)55-44(43-54-56(50,51)53-41-40-47(3,4)5)42-52-45(48)38-36-34-32-30-28-26-19-17-15-13-11-9-7-2/h14,16,20-21,23-24,27,29,33,35,44H,6-13,15,17-19,22,25-26,28,30-32,34,36-43H2,1-5H3/b16-14-,21-20-,24-23-,29-27-,35-33-/t44-/m1/s1;InChI=1S/C46H82NO8P/c1-6-8-10-12-14-16-18-20-21-22-23-24-25-27-29-31-33-35-37-39-46(49)5…	PC aa C38:5	PC	[M+H]+	808.6	184	136	10	44	15
LMSD:LMGP01010659; LMSD:LMGP01010811; LMSD:LMGP01010845; LMSD:LMGP01010909; LMSD:LMGP01011017	C46H80NO8P	CCCCCCCCCCCCCCCC(=O)OC[C@H](COP([O-])(=O)OCC[N+](C)(C)C)OC(=O)CC\C=C\C\C=C\C\C=C\C\C=C\C\C=C\C\C=C\CC;CCCCCCCCCCCCCCCC(=O)OC[C@]([H])(COP([O-])(=O)OCC[N+](C)(C)C)OC(=O)CC\C=C/C\C=C/C\C=C/C\C=C/C\C=C/C\C=C/CC;CCCCCCCCCCCCCCCC(=O)O[C@]([H])(COC(=O)CC\C=C/C\C=C/C\C=C/C\C=C/C\C=C/C\C=C/CC)COP([O-])(=O)OCC[N+](C)(C)C;CCCCCCCC\C=C/CCCCCCCC(=O)OC[C@]([H])(COP([O-])(=O)OCC[N+](C)(C)C)OC(=O)CCC\C=C/C\C=C/…	InChI=1S/C46H80NO8P/c1-6-8-10-12-14-16-18-20-21-22-23-24-25-27-28-30-32-34-36-38-45(48)52-42-44(43-54-56(50,51)53-41-40-47(3,4)5)55-46(49)39-37-35-33-31-29-26-19-17-15-13-11-9-7-2/h8,10,14,16,20-21,23-24,27-28,32,34,44H,6-7,9,11-13,15,17-19,22,25-26,29-31,33,35-43H2,1-5H3/b10-8-,16-14-,21-20-,24-23-,28-27-,34-32-/t44-/m1/s1;InChI=1S/C46H80NO8P/c1-6-8-10-12-14-16-18-20-21-22-23-24-25-27-29-31-33-3…	PC aa C38:6	PC	[M+H]+	806.6	184	135	10	44	15
LMSD:LMGP01011021; LMSD:LMGP01011038	C48H94NO8P	CCCCCCCCCCCCCCCC(=O)OC[C@]([H])(COP([O-])(=O)OCC[N+](C)(C)C)OC(=O)CCCCCCCCCCCCC\C=C/CCCCCCCC;CCCCCCCCCCCCCCCCCC(=O)OC[C@]([H])(COP([O-])(=O)OCC[N+](C)(C)C)OC(=O)CCCCCCCCCCC\C=C/CCCCCCCC;CCCCCCCCCCCCCCCCCCCC(=O)OC[C@]([H])(COP([O-])(=O)OCC[N+](C)(C)C)OC(=O)CCCCCCCCC\C=C/CCCCCCCC;CCCCCCCCCCCCCCCCCCCCCC(=O)O[C@]([H])(COC(=O)CCCCCCCCC\C=C/CCCCCC)COP([O-])(=O)OCC[N+](C)(C)C;CCCCCCCCCCCCCCCCCCCCCC(=O)O…	InChI=1S/C48H94NO8P/c1-6-8-10-12-14-16-18-20-21-22-23-24-25-26-27-29-31-33-35-37-39-41-48(51)57-46(45-56-58(52,53)55-43-42-49(3,4)5)44-54-47(50)40-38-36-34-32-30-28-19-17-15-13-11-9-7-2/h20-21,46H,6-19,22-45H2,1-5H3/b21-20-/t46-/m1/s1;InChI=1S/C48H94NO8P/c1-6-8-10-12-14-16-18-20-22-23-24-25-27-29-31-33-35-37-39-41-48(51)57-46(45-56-58(52,53)55-43-42-49(3,4)5)44-54-47(50)40-38-36-34-32-30-28-26-21…	PC aa C40:1	PC	[M+H]+	844.7	184	145	10	47	15
LMSD:LMGP01011022; LMSD:LMGP01011612; LMSD:LMGP01011799; LMSD:LMGP01012159; LMSD:LMGP01012185	C48H92NO8P	CCCCCCCCCCCCCCCCCCCC(=O)OC[C@]([H])(COP([O-])(=O)OCC[N+](C)(C)C)OC(=O)CCCCCCCCC\C=C/C\C=C/CCCCC;CCCCCCCC\C=C/CCCCCCCCCC(=O)OC[C@]([H])(COP([O-])(=O)OCC[N+](C)(C)C)OC(=O)CCCCCCCCC\C=C/CCCCCCCC;	InChI=1S/C48H92NO8P/c1-6-8-10-12-14-16-18-20-22-24-26-28-30-32-34-36-38-40-47(50)54-44-46(45-56-58(52,53)55-43-42-49(3,4)5)57-48(51)41-39-37-35-33-31-29-27-25-23-21-19-17-15-13-11-9-7-2/h15,17,21,23,46H,6-14,16,18-20,22,24-45H2,1-5H3/b17-15-,23-21-/t46-/m1/s1;InChI=1S/C48H92NO8P/c1-6-8-10-12-14-16-18-20-22-24-26-28-30-32-34-36-38-40-47(50)54-44-46(45-56-58(52,53)55-43-42-49(3,4)5)57-48(51)41-39-3…	PC aa C40:2	PC	[M+H]+	842.7	184	144	10	47	15
LMSD:LMGP01010813; LMSD:LMGP01011023; LMSD:LMGP01012077	C48H90NO8P	CCCCCCCCCCCCCCCCCCCC(=O)OC[C@H](COP([O-])(=O)OCC[N+](C)(C)C)OC(=O)CCCCCCCCC\C=C/C\C=C/C\C=C/CC;CCCCCCCCCCCCCCCCCCCC(=O)OC[C@]([H])(COP([O-])(=O)OCC[N+](C)(C)C)OC(=O)CCCCCC\C=C/C\C=C/C\C=C/CCCCC;CCCCCCCCCCCCCCCCCCCC(=O)OC[C@]([H])(COP([O-])(=O)OCC[N+](C)(C)C)OC(=O)CCC\C=C/C\C=C/C\C=C/CCCCCCCC;CCCCCCCC\C=C/CCCCCCCC(=O)OC[C@]([H])(COP([O-])(=O)OCC[N+](C)(C)C)OC(=O)CCCCCCCCCCC\C=C/C\C=C/CCCCC;CCCCCC\…	InChI=1S/C48H90NO8P/c1-6-8-10-12-14-16-18-20-22-23-24-25-27-29-31-33-35-37-39-41-48(51)57-46(45-56-58(52,53)55-43-42-49(3,4)5)44-54-47(50)40-38-36-34-32-30-28-26-21-19-17-15-13-11-9-7-2/h14,16,20-22,26,46H,6-13,15,17-19,23-25,27-45H2,1-5H3/b16-14-,22-20-,26-21-/t46-/m1/s1;InChI=1S/C48H90NO8P/c1-6-8-10-12-14-16-18-20-22-23-24-25-27-29-31-33-35-37-39-41-48(51)57-46(45-56-58(52,53)55-43-42-49(3,4)5)…	PC aa C40:3	PC	[M+H]+	840.7	184	144	10	47	15
LMSD:LMGP01010816; LMSD:LMGP01010818; LMSD:LMGP01011613	C48H88NO8P	CCCCCCCCCCCCCCCCCC(=O)OC[C@]([H])(COP([O-])(=O)OCC[N+](C)(C)C)OC(=O)CCCCC\C=C/C\C=C/C\C=C/C\C=C/CCCCC;CCCCCCCCCCCCCCCCCC(=O)O[C@]([H])(COC(=O)CCCCC\C=C/C\C=C/C\C=C/C\C=C/CCCCC)COP([O-])(=O)OCC[N+](C)(C)C;CCCCCCCCCCCCCCCCCCCC(=O)OC[C@]([H])(COP([O-])(=O)OCC[N+](C)(C)C)OC(=O)CCC\C=C/C\C=C/C\C=C/C\C=C/CCCCC;[C@](COC(=O)*)(OC(=O)*)([H])COP(OCC[N+](C)(C)C)(=O)[O-];	InChI=1S/C48H88NO8P/c1-6-8-10-12-14-16-18-20-22-23-24-25-27-28-30-32-34-36-38-40-47(50)54-44-46(45-56-58(52,53)55-43-42-49(3,4)5)57-48(51)41-39-37-35-33-31-29-26-21-19-17-15-13-11-9-7-2/h14,16,20,22,24-25,28,30,46H,6-13,15,17-19,21,23,26-27,29,31-45H2,1-5H3/b16-14-,22-20-,25-24-,30-28-/t46-/m1/s1;InChI=1S/C48H88NO8P/c1-6-8-10-12-14-16-18-20-22-23-24-25-27-29-31-33-35-37-39-41-48(51)57-46(45-56-58…	PC aa C40:4	PC	[M+H]+	838.6	184	144	10	47	15
LMSD:LMGP01010821; LMSD:LMGP01010823; LMSD:LMGP01010846	C48H86NO8P	CCCCCCCCCCCCCCCCCC(=O)OC[C@H](COP([O-])(=O)OCC[N+](C)(C)C)OC(=O)CCCC\C=C/C\C=C/C\C=C/C\C=C/C\C=C/CCC;CCCCCCCCCCCCCCCCCC(=O)OC[C@]([H])(COP([O-])(=O)OCC[N+](C)(C)C)OC(=O)CCCCC\C=C/C\C=C/C\C=C/C\C=C/C\C=C/CC;CCCCCCCCCCCCCCCCCC(=O)OC[C@]([H])(COP([O-])(=O)OCC[N+](C)(C)C)OC(=O)CC\C=C/C\C=C/C\C=C/C\C=C/C\C=C/CCCCC;CCCCCCCC\C=C/CCCCCCCC(=O)OC[C@]([H])(COP([O-])(=O)OCC[N+](C)(C)C)OC(=O)CCCCC\C=C/C\C=C/C…	InChI=1S/C48H86NO8P/c1-6-8-10-12-14-16-18-20-22-23-24-25-27-29-31-33-35-37-39-41-48(51)57-46(45-56-58(52,53)55-43-42-49(3,4)5)44-54-47(50)40-38-36-34-32-30-28-26-21-19-17-15-13-11-9-7-2/h10,12,16,18,22-23,25,27,31,33,46H,6-9,11,13-15,17,19-21,24,26,28-30,32,34-45H2,1-5H3/b12-10-,18-16-,23-22-,27-25-,33-31-/t46-/m1/s1;InChI=1S/C48H86NO8P/c1-6-8-10-12-14-16-18-20-22-23-24-25-27-29-31-33-35-37-39-41…	PC aa C40:5	PC	[M+H]+	836.6	184	143	10	47	15
LMSD:LMGP01010825; LMSD:LMGP01011025; LMSD:LMGP01011150; LMSD:LMGP01011994	C48H84NO8P	CCCCCCCCCCCCCCCCCC(=O)OC[C@H](COP([O-])(=O)OCC[N+](C)(C)C)OC(=O)CCCCCCC\C=C/C=C\C=C/C=C\C=C/C=C/CC;CCCCCCCCCCCCCCCCCC(=O)OC[C@]([H])(COP([O-])(=O)OCC[N+](C)(C)C)OC(=O)CC\C=C/C\C=C/C\C=C/C\C=C/C\C=C/C\C=C/CC;CCCCCCCC\C=C/CCCCCCCC(=O)OC[C@H](COP([O-])(=O)OCC[N+](C)(C)C)OC(=O)CCCCC\C=C/C\C=C/C\C=C/C\C=C/C\C=C/CC;CCCCCC\C=C/CCCCCCCCCC(=O)OC[C@]([H])(COP([O-])(=O)OCC[N+](C)(C)C)OC(=O)CCCCC\C=C/C\C=C/C…	InChI=1S/C48H84NO8P/c1-6-8-10-12-14-16-18-20-22-23-24-25-27-29-31-33-35-37-39-41-48(51)57-46(45-56-58(52,53)55-43-42-49(3,4)5)44-54-47(50)40-38-36-34-32-30-28-26-21-19-17-15-13-11-9-7-2/h8,10,12,14,16,18,20,22-25,27,46H,6-7,9,11,13,15,17,19,21,26,28-45H2,1-5H3/b10-8+,14-12-,18-16-,22-20-,24-23-,27-25-/t46-/m1/s1;InChI=1S/C48H84NO8P/c1-6-8-10-12-14-16-18-20-22-23-24-25-27-29-31-33-35-37-39-41-48(5…	PC aa C40:6	PC	[M+H]+	834.6	184	143	10	46	15
LMSD:LMGP01010826; LMSD:LMGP01010915; LMSD:LMGP01011026; LMSD:LMGP01011097; LMSD:LMGP01011152	C50H100NO8P	[H][C@@](COC(=O)CCCCCCCCCCCCCCCCC)(COP([O-])(=O)OCC[N+](C)(C)C)OC(=O)CCCCCCCCCCCCCCCCCCCCCCC;[H][C@@](COC(=O)CCCCCCCCCCCCCCCCCCC)(COP([O-])(=O)OCC[N+](C)(C)C)OC(=O)CCCCCCCCCCCCCCCCCCCCC;[H][C@@](COC(=O)CCCCCCCCCCCCCCCCCCCCC)(COP([O-])(=O)OCC[N+](C)(C)C)OC(=O)CCCCCCCCCCCCCCCCCCC;[H][C@@](COC(=O)CCCCCCCCCCCCCCCCCCCCCCC)(COP([O-])(=O)OCC[N+](C)(C)C)OC(=O)CCCCCCCCCCCCCCCCC;[H][C@@](COC([*])=O)(COP([O…	InChI=1S/C50H100NO8P/c1-6-8-10-12-14-16-18-20-22-23-24-25-26-27-29-30-32-34-36-38-40-42-49(52)56-46-48(47-58-60(54,55)57-45-44-51(3,4)5)59-50(53)43-41-39-37-35-33-31-28-21-19-17-15-13-11-9-7-2/h48H,6-47H2,1-5H3/t48-/m1/s1;InChI=1S/C50H100NO8P/c1-6-8-10-12-14-16-18-20-22-23-24-25-26-27-29-31-33-35-37-39-41-43-50(53)59-48(47-58-60(54,55)57-45-44-51(3,4)5)46-56-49(52)42-40-38-36-34-32-30-28-21-19-17…	PC aa C42:0	PC	[M+H]+	874.7	184	154	10	50	15
LMSD:LMGP01010665; LMSD:LMGP01011803; LMSD:LMGP01011861; LMSD:LMGP01011995; LMSD:LMGP01012054; LMSD:LMGP01012162; LMSD:LMGP01012167; LMSD:LMGP01012173; LMSD:LMGP01012189; LMSD:LMGP01012227; LMSD:LMGP01012237; LMSD:LMGP01012241; LMSD:LMGP01012242; LMSD:LMGP01030150	C50H98NO8P	CCCCCCCCCCCCCCCCCC(=O)OC[C@]([H])(COP([O-])(=O)OCC[N+](C)(C)C)OC(=O)CCCCCCCCCCCCC\C=C/CCCCCCCC;CCCCCCCCCCCCCCCCCCCC(=O)OC[C@]([H])(COP([O-])(=O)OCC[N+](C)(C)C)OC(=O)CCCCCCCCCCC\C=C/CCCCCCCC;CCCCCCCCCCCCCCCCCCCCCC(=O)OC[C@]([H])(COP([O-])(=O)OCC[N+](C)(C)C)OC(=O)CCCCCCCCC\C=C/CCCCCCCC;CCCCCCCCCCCCCCCCCCCCCCCC(=O)OC[C@]([H])(COP([O-])(=O)OCC[N+](C)(C)C)OC(=O)CCCCCCC\C=C/CCCCCCCC;CCCCCCCCCCCCCCCCCCC…	InChI=1S/C50H98NO8P/c1-6-8-10-12-14-16-18-20-22-23-24-25-26-27-29-30-32-34-36-38-40-42-49(52)56-46-48(47-58-60(54,55)57-45-44-51(3,4)5)59-50(53)43-41-39-37-35-33-31-28-21-19-17-15-13-11-9-7-2/h21,28,48H,6-20,22-27,29-47H2,1-5H3/b28-21-/t48-/m1/s1;InChI=1S/C50H98NO8P/c1-6-8-10-12-14-16-18-20-22-23-24-25-26-27-29-31-33-35-37-39-41-43-50(53)59-48(47-58-60(54,55)57-45-44-51(3,4)5)46-56-49(52)42-40-38…	PC aa C42:1	PC	[M+H]+	872.7	184	153	10	50	15
LMSD:LMGP01012177	C50H96NO8P	CCCCCCCCCCCCCCCCCCCC(=O)OC[C@]([H])(COP([O-])(=O)OCC[N+](C)(C)C)OC(=O)CCCCCCCCCCC\C=C/C\C=C/CCCCC;CCCCCCCCCCCCCCCCCCCC(=O)O[C@]([H])(COC(=O)CCCCCCCCCCC\C=C/C\C=C/CCCCC)COP([O-])(=O)OCC[N+](C)(C)C;CCCCCCCCCCCCCCCCCCCCCC(=O)OC[C@]([H])(COP([O-])(=O)OCC[N+](C)(C)C)OC(=O)CCCCCCCCC\C=C/C\C=C/CCCCC;CCCCCCCCCCCCCCCCCCCCCC(=O)O[C@]([H])(COC(=O)CCCCCCCCC\C=C/C\C=C/CCCCC)COP([O-])(=O)OCC[N+](C)(C)C;CCCCCCC…	InChI=1S/C50H96NO7P/c1-6-8-10-12-14-16-18-20-22-24-25-26-27-28-29-31-33-35-37-39-41-43-50(52)58-49(48-57-59(53,54)56-46-44-51(3,4)5)47-55-45-42-40-38-36-34-32-30-23-21-19-17-15-13-11-9-7-2/h20-23,42,45,49H,6-19,24-41,43-44,46-48H2,1-5H3/b22-20-,23-21-,45-42-/t49-/m1/s1;InChI=1S/C50H96NO8P/c1-6-8-10-12-14-16-18-20-21-22-23-24-25-26-27-28-29-31-33-35-37-39-41-43-50(53)59-48(47-58-60(54,55)57-45-44-…	PC aa C42:2	PC	[M+H]+	870.7	184	153	10	50	15
LMSD:LMGP01011027	C50H92NO8P	CCCCCCCC\C=C/CCCCCCCCCCCCCC(=O)O[C@]([H])(COC(=O)CCCC\C=C/C\C=C/C\C=C/CCCCC)COP([O-])(=O)OCC[N+](C)(C)C;[H][C@@](COC([*])=O)(COP([O-])(=O)OCC[N+](C)(C)C)OC([*])=O;	InChI=1S/C50H92NO8P/c1-6-8-10-12-14-16-18-20-22-23-24-25-26-27-29-31-33-35-37-39-41-43-50(53)59-48(47-58-60(54,55)57-45-44-51(3,4)5)46-56-49(52)42-40-38-36-34-32-30-28-21-19-17-15-13-11-9-7-2/h15,17,20-22,28,32,34,48H,6-14,16,18-19,23-27,29-31,33,35-47H2,1-5H3/b17-15-,22-20-,28-21-,34-32-/t48-/m1/s1	PC aa C42:4	PC	[M+H]+	866.7	184	152	10	50	15
LMSD:LMGP01011028	C50H90NO8P	CCCCCCCCCCCCCCCCCCCC(=O)OC[C@]([H])(COP([O-])(=O)OCC[N+](C)(C)C)OC(=O)CCCCC\C=C/C\C=C/C\C=C/C\C=C/C\C=C/CC;[H][C@@](COC([*])=O)(COP([O-])(=O)OCC[N+](C)(C)C)OC([*])=O;	InChI=1S/C50H90NO8P/c1-6-8-10-12-14-16-18-20-22-24-25-27-29-31-33-35-37-39-41-43-50(53)59-48(47-58-60(54,55)57-45-44-51(3,4)5)46-56-49(52)42-40-38-36-34-32-30-28-26-23-21-19-17-15-13-11-9-7-2/h8,10,14,16,20,22,25,27,31,33,48H,6-7,9,11-13,15,17-19,21,23-24,26,28-30,32,34-47H2,1-5H3/b10-8-,16-14-,22-20-,27-25-,33-31-/t48-/m1/s1	PC aa C42:5	PC	[M+H]+	864.7	184	151	10	49	15
LMSD:LMGP01020012	C50H88NO8P	CCCCCCCCCCCCCCCCCCCC(=O)OC[C@]([H])(COP([O-])(=O)OCC[N+](C)(C)C)OC(=O)CC\C=C/C\C=C/C\C=C/C\C=C/C\C=C/C\C=C/CC;[H][C@@](COC([*])=O)(COP([O-])(=O)OCC[N+](C)(C)C)OC([*])=O;	InChI=1S/C50H88NO8P/c1-6-8-10-12-14-16-18-20-22-24-25-27-29-31-33-35-37-39-41-43-50(53)59-48(47-58-60(54,55)57-45-44-51(3,4)5)46-56-49(52)42-40-38-36-34-32-30-28-26-23-21-19-17-15-13-11-9-7-2/h8,10,14,16,20,22,25,27,31,33,37,39,48H,6-7,9,11-13,15,17-19,21,23-24,26,28-30,32,34-36,38,40-47H2,1-5H3/b10-8-,16-14-,22-20-,27-25-,33-31-,39-37-/t48-/m1/s1	PC aa C42:6	PC	[M+H]+	862.6	184	150	10	49	15
LMSD:LMGP01020014; LMSD:LMGP01020179	C38H78NO7P	C[N+](C)(C)CCOP([O-])(=O)OC[C@@H](CO[*])O[*];[H][C@@](COCCCCCCCCCCCCCC)(COP([O-])(=O)OCC[N+](C)(C)C)OC(=O)CCCCCCCCCCCCCCC;	InChI=1S/C38H78NO7P/c1-6-8-10-12-14-16-18-20-21-23-25-27-29-31-38(40)46-37(36-45-47(41,42)44-34-32-39(3,4)5)35-43-33-30-28-26-24-22-19-17-15-13-11-9-7-2/h37H,6-36H2,1-5H3/t37-/m1/s1	PC ae C30:0	O-PC	[M+H]+	692.6	184	111	10	37	15
	C38H76NO7P	CCCCCCCCCCCCCCCCOC[C@]([H])(COP([O-])(=O)OCC[N+](C)(C)C)OC(=O)CCCCCCC\C=C/CCCC;CCCCCCCCCCCCCCOC[C@]([H])(COP([O-])(=O)OCC[N+](C)(C)C)OC(=O)CCCCCCC\C=C/CCCCCC;C[N+](C)(C)CCOP([O-])(=O)OC[C@@H](CO[*])O[*]	InChI=1S/C38H76NO7P/c1-6-8-10-12-14-16-18-19-20-22-24-26-28-30-33-43-35-37(36-45-47(41,42)44-34-32-39(3,4)5)46-38(40)31-29-27-25-23-21-17-15-13-11-9-7-2/h13,15,37H,6-12,14,16-36H2,1-5H3/b15-13-/t37-/m1/s1;InChI=1S/C38H76NO7P/c1-6-8-10-12-14-16-18-20-21-23-25-27-29-31-38(40)46-37(36-45-47(41,42)44-34-32-39(3,4)5)35-43-33-30-28-26-24-22-19-17-15-13-11-9-7-2/h16,18,37H,6-15,17,19-36H2,1-5H3/b18-16-/…	PC ae C30:1	O-PC	[M+H]+	690.5	184	109	10	36	15
LMSD:LMGP01020016; LMSD:LMGP01020182	C38H74NO7P	CCCCCC\C=C/CCCCCCCCOC[C@]([H])(COP([O-])(=O)OCC[N+](C)(C)C)OC(=O)CCCCCCC\C=C/CCCC;C[N+](C)(C)CCOP([O-])(=O)OC[C@@H](CO[*])O[*];	InChI=1S/C38H74NO7P/c1-6-8-10-12-14-16-18-19-20-22-24-26-28-30-33-43-35-37(36-45-47(41,42)44-34-32-39(3,4)5)46-38(40)31-29-27-25-23-21-17-15-13-11-9-7-2/h13,15-16,18,37H,6-12,14,17,19-36H2,1-5H3/b15-13-,18-16-/t37-/m1/s1	PC ae C30:2	O-PC	[M+H]+	688.5	184	108	10	36	15
	C40H80NO7P	CCCCCCCCCCCCCCCC(=O)OCC(COP([O-])(=O)OCC[N+](C)(C)C)O\C=C/CCCCCCCCCCCCCC;CCCCCCCCCCCCCCCCOC[C@]([H])(COP([O-])(=O)OCC[N+](C)(C)C)OC(=O)CCCCCCC\C=C/CCCCCC;CCCCCCCCCCCCCCCC\C=C/OC(COC(=O)CCCCCCCCCCCCC)COP([O-])(=O)OCC[N+](C)(C)C;CCCCCCCCCCCCCCOC[C@H](COP([O-])(=O)OCC[N+](C)(C)C)OC(=O)CCCCCCC\C=C/CCCCCCCC;C[N+](C)([CH2-])CCO[P+]([O-])(=O)OC[C@@H](CO[*])O[*]	InChI=1S/C40H80NO7P/c1-6-8-10-12-14-16-18-19-20-21-22-24-26-28-30-32-35-45-39(38-48-49(43,44)47-36-34-41(3,4)5)37-46-40(42)33-31-29-27-25-23-17-15-13-11-9-7-2/h32,35,39H,6-31,33-34,36-38H2,1-5H3/b35-32-;InChI=1S/C40H80NO7P/c1-6-8-10-12-14-16-18-20-21-22-23-25-27-29-31-33-40(42)48-39(38-47-49(43,44)46-36-34-41(3,4)5)37-45-35-32-30-28-26-24-19-17-15-13-11-9-7-2/h20-21,39H,6-19,22-38H2,1-5H3/b21-20-…	PC ae C32:1	O-PC	[M+H]+	718.6	184	115	10	38	15
LMSD:LMGP01020033	C40H78NO7P	CCCCCC\C=C/CCCCCCCCOC[C@]([H])(COP([O-])(=O)OCC[N+](C)(C)C)OC(=O)CCCCCCC\C=C/CCCCCC;C[N+](C)(C)CCOP([O-])(=O)OC[C@@H](CO[*])O[*];	InChI=1S/C40H78NO7P/c1-6-8-10-12-14-16-18-20-22-24-26-28-30-32-35-45-37-39(38-47-49(43,44)46-36-34-41(3,4)5)48-40(42)33-31-29-27-25-23-21-19-17-15-13-11-9-7-2/h16-19,39H,6-15,20-38H2,1-5H3/b18-16-,19-17-/t39-/m1/s1	PC ae C32:2	O-PC	[M+H]+	716.6	184	114	10	37	15
LMSD:LMGP01020152	C42H86NO7P	[H][C@@](COCCCCCCCCCCCCCCCC)(COP([O-])(=O)OCC[N+](C)(C)C)OC(=O)CCCCCCCCCCCCCCCCC;[H][C@@](CO[*])(COP([O-])(=O)OCC[N+](C)(C)C)O[*];	InChI=1S/C42H86NO7P/c1-6-8-10-12-14-16-18-20-22-23-25-27-29-31-33-35-42(44)50-41(40-49-51(45,46)48-38-36-43(3,4)5)39-47-37-34-32-30-28-26-24-21-19-17-15-13-11-9-7-2/h41H,6-40H2,1-5H3/t41-/m1/s1	PC ae C34:0	O-PC	[M+H]+	748.6	184	122	10	40	15
LMSD:LMGP01020039	C42H84NO7P	CCCCCCCCCCCCCCCC(=O)O[C@]([H])(COCCCCCCCC\C=C/CCCCCCCC)COP([O-])(=O)OCC[N+](C)(C)C;[H][C@@](CO[*])(COP([O-])(=O)OCC[N+](C)(C)C)O[*];	InChI=1S/C42H84NO7P/c1-6-8-10-12-14-16-18-20-21-22-24-26-28-30-32-34-37-47-39-41(40-49-51(45,46)48-38-36-43(3,4)5)50-42(44)35-33-31-29-27-25-23-19-17-15-13-11-9-7-2/h20-21,41H,6-19,22-40H2,1-5H3/b21-20-/t41-/m1/s1	PC ae C34:1	O-PC	[M+H]+	746.6	184	121	10	39	15
LMSD:LMGP01020041; LMSD:LMGP01020257	C42H82NO7P	CCCCCCCCCCCCCCCCOC[C@]([H])(COP([O-])(=O)OCC[N+](C)(C)C)OC(=O)CCCCCCC\C=C/C\C=C/CCCCC;[H][C@@](CO[*])(COP([O-])(=O)OCC[N+](C)(C)C)O[*];	InChI=1S/C42H82NO7P/c1-6-8-10-12-14-16-18-20-22-23-25-27-29-31-33-35-42(44)50-41(40-49-51(45,46)48-38-36-43(3,4)5)39-47-37-34-32-30-28-26-24-21-19-17-15-13-11-9-7-2/h14,16,20,22,41H,6-13,15,17-19,21,23-40H2,1-5H3/b16-14-,22-20-/t41-/m1/s1	PC ae C34:2	O-PC	[M+H]+	744.6	184	120	10	39	15
LMSD:LMGP01020051; LMSD:LMGP01020091	C42H80NO7P	CCCCCCCCCCCCCCCCOC[C@H](COP([O-])(=O)OCC[N+](C)(C)C)OC(=O)CCCC\C=C/C\C=C/C\C=C/CCCCC;CCCCCC\C=C/CCCCCCCCOC[C@]([H])(COP([O-])(=O)OCC[N+](C)(C)C)OC(=O)CCCCCCC\C=C/C\C=C/CCCCC;[H][C@@](CO[*])(COP([O-])(=O)OCC[N+](C)(C)C)O[*]	InChI=1S/C42H80NO7P/c1-6-8-10-12-14-16-18-20-22-23-25-27-29-31-33-35-42(44)50-41(40-49-51(45,46)48-38-36-43(3,4)5)39-47-37-34-32-30-28-26-24-21-19-17-15-13-11-9-7-2/h14,16,20,22,25,27,41H,6-13,15,17-19,21,23-24,26,28-40H2,1-5H3/b16-14-,22-20-,27-25-/t41-/m1/s1;InChI=1S/C42H80NO7P/c1-6-8-10-12-14-16-18-20-22-23-25-27-29-31-33-35-42(44)50-41(40-49-51(45,46)48-38-36-43(3,4)5)39-47-37-34-32-30-28-26-…	PC ae C34:3	O-PC	[M+H]+	742.6	184	120	10	39	15
LMSD:LMGP01020052; LMSD:LMGP01020258	C44H90NO7P	[H][C@@](COCCCCCCCCCCCCCCCC)(COP([O-])(=O)OCC[N+](C)(C)C)OC(=O)CCCCCCCCCCCCCCCCCCC;[H][C@@](COCCCCCCCCCCCCCCCCCC)(COP([O-])(=O)OCC[N+](C)(C)C)OC(=O)CCCCCCCCCCCCCCCCC;[H][C@@](CO[*])(COP([O-])(=O)OCC[N+](C)(C)C)O[*]	InChI=1S/C44H90NO7P/c1-6-8-10-12-14-16-18-20-22-23-24-25-27-29-31-33-35-37-44(46)52-43(42-51-53(47,48)50-40-38-45(3,4)5)41-49-39-36-34-32-30-28-26-21-19-17-15-13-11-9-7-2/h43H,6-42H2,1-5H3/t43-/m1/s1;InChI=1S/C44H90NO7P/c1-6-8-10-12-14-16-18-20-22-24-26-28-30-32-34-36-39-49-41-43(42-51-53(47,48)50-40-38-45(3,4)5)52-44(46)37-35-33-31-29-27-25-23-21-19-17-15-13-11-9-7-2/h43H,6-42H2,1-5H3/t43-/m1/s1	PC ae C36:0	O-PC	[M+H]+	776.7	184	128	10	42	15
LMSD:LMGP01020188; LMSD:LMGP01020203; LMSD:LMGP01020263; LMSD:LMGP01030013	C44H88NO7P	CCCCCCCCCCCCCCCCCC(=O)O[C@]([H])(COCCCCCCCC\C=C/CCCCCCCC)COP([O-])(=O)OCC[N+](C)(C)C;CCCCCCCCCCCCCCCCCCCC(=O)O[C@]([H])(COCCCCCCCC\C=C/CCCCCC)COP([O-])(=O)OCC[N+](C)(C)C;CCCCCCCCCCCCCCCCOC[C@H](COP([O-])(=O)OCC[N+](C)(C)C)OC(=O)CCCCCCC\C=C/CCCCCCCCCC;[H][C@@](CO[*])(COP([O-])(=O)OCC[N+](C)(C)C)O[*];	InChI=1S/C44H88NO7P/c1-6-8-10-12-14-16-18-20-22-23-24-25-27-29-31-33-35-37-44(46)52-43(42-51-53(47,48)50-40-38-45(3,4)5)41-49-39-36-34-32-30-28-26-21-19-17-15-13-11-9-7-2/h17,19,43H,6-16,18,20-42H2,1-5H3/b19-17-/t43-/m1/s1;InChI=1S/C44H88NO7P/c1-6-8-10-12-14-16-18-20-22-23-24-25-27-29-31-33-35-37-44(46)52-43(42-51-53(47,48)50-40-38-45(3,4)5)41-49-39-36-34-32-30-28-26-21-19-17-15-13-11-9-7-2/h23-2…	PC ae C36:1	O-PC	[M+H]+	774.6	184	127	10	41	15
LMSD:LMGP01020053; LMSD:LMGP01020262; LMSD:LMGP01020264	C44H86NO7P	CCCCCCCCCCCCCCCCCCOC[C@]([H])(COP([O-])(=O)OCC[N+](C)(C)C)OC(=O)CCCCCCC\C=C/C\C=C/CCCCC;CCCCCCCCCCCCCCCCOC[C@H](COP([O-])(=O)OCC[N+](C)(C)C)OC(=O)CCCCCCCCC\C=C/C\C=C/CCCCC;CCCCCCCCCCCCCCCC\C=C/OC[C@]([H])(COP([O-])(=O)OCC[N+](C)(C)C)OC(=O)CCCCCCC\C=C/CCCCCCCC;CCCCCCCC\C=C/CCCCCCCCOC[C@]([H])(COP([O-])(=O)OCC[N+](C)(C)C)OC(=O)CCCCCCCCC\C=C/CCCCCC;[H][C@@](CO[*])(COP([O-])(=O)OCC[N+](C)(C)C)O[*]	InChI=1S/C44H86NO7P/c1-6-8-10-12-14-16-18-20-22-23-24-25-27-29-31-33-35-37-44(46)52-43(42-51-53(47,48)50-40-38-45(3,4)5)41-49-39-36-34-32-30-28-26-21-19-17-15-13-11-9-7-2/h14,16,20,22,43H,6-13,15,17-19,21,23-42H2,1-5H3/b16-14-,22-20-/t43-/m1/s1;InChI=1S/C44H86NO7P/c1-6-8-10-12-14-16-18-20-22-24-26-28-30-32-34-36-39-49-41-43(42-51-53(47,48)50-40-38-45(3,4)5)52-44(46)37-35-33-31-29-27-25-23-21-19-1…	PC ae C36:2	O-PC	[M+H]+	772.6	184	127	10	41	15
LMSD:LMGP01020056; LMSD:LMGP01020245; LMSD:LMGP01020270	C44H84NO7P	CCCCCCCCCCCCCCCCOC[C@H](COP([O-])(=O)OCC[N+](C)(C)C)OC(=O)CCCCCC\C=C/C\C=C/C\C=C/CCCCC;CCCCCCCC\C=C/CCCCCCCCOC[C@]([H])(COP([O-])(=O)OCC[N+](C)(C)C)OC(=O)CCCCCCC\C=C/C\C=C/CCCCC;CCCCCC\C=C/CCCCCCCCCCOC[C@]([H])(COP([O-])(=O)OCC[N+](C)(C)C)OC(=O)CCCCCCC\C=C/C\C=C/CCCCC;[H][C@@](COC)(COP([O-])(=O)OCC[N+](C)(C)C)OC;	InChI=1S/C44H84NO7P/c1-6-8-10-12-14-16-18-20-22-23-24-25-27-29-31-33-35-37-44(46)52-43(42-51-53(47,48)50-40-38-45(3,4)5)41-49-39-36-34-32-30-28-26-21-19-17-15-13-11-9-7-2/h14,16,20,22,24-25,43H,6-13,15,17-19,21,23,26-42H2,1-5H3/b16-14-,22-20-,25-24-/t43-/m1/s1;InChI=1S/C44H84NO7P/c1-6-8-10-12-14-16-18-20-22-24-26-28-30-32-34-36-39-49-41-43(42-51-53(47,48)50-40-38-45(3,4)5)52-44(46)37-35-33-31-29-…	PC ae C36:3	O-PC	[M+H]+	770.6	184	126	10	41	15
LMSD:LMGP01020058; LMSD:LMGP01030010	C44H82NO7P	CCCCC\C=C/C\C=C/CCCCCCCCOC[C@]([H])(COP([O-])(=O)OCC[N+](C)(C)C)OC(=O)CCCCCCC\C=C/C\C=C/CCCCC;P(OC[C@@H](COCCCCCCCCCCCCCCCC)OC(CCC/C=C\C/C=C\C/C=C\C/C=C\CCCCC)=O)(=O)(OCC[N+](C)(C)C)[O-];[H][C@@](COCCCCCCCCCCCCCCCC)(COP([O-])(=O)OCC[N+](C)(C)C)OC(=O)CCCCCC\C=C/C\C=C/C\C=C/C\C=C/CC;[H][C@@](CO[*])(COP([O-])(=O)OCC[N+](C)(C)C)O[*];	InChI=1S/C44H82NO7P/c1-6-8-10-12-14-16-18-20-22-23-24-25-27-29-31-33-35-37-44(46)52-43(42-51-53(47,48)50-40-38-45(3,4)5)41-49-39-36-34-32-30-28-26-21-19-17-15-13-11-9-7-2/h14,16,20,22,24-25,29,31,43H,6-13,15,17-19,21,23,26-28,30,32-42H2,1-5H3/b16-14-,22-20-,25-24-,31-29-/t43-/m1/s1;InChI=1S/C44H82NO7P/c1-6-8-10-12-14-16-18-20-22-23-24-25-27-29-31-33-35-37-44(46)52-43(42-51-53(47,48)50-40-38-45(3,…	PC ae C36:4	O-PC	[M+H]+	768.6	184	126	10	41	15
LMSD:LMGP01020060; LMSD:LMGP01020097	C44H80NO7P	CCCCCCCCCCCCCCCCOC[C@H](COP([O-])(=O)OCC[N+](C)(C)C)OC(=O)CCC\C=C/C\C=C/C\C=C/C\C=C/C\C=C/CC;CCCCCCCCCCCCCC\C=C/OC[C@]([H])(COP([O-])(=O)OCC[N+](C)(C)C)OC(=O)CCC\C=C/C\C=C/C\C=C/C\C=C/CCCCC;CCCCCC\C=C/CCCCCCCCOC[C@]([H])(COP([O-])(=O)OCC[N+](C)(C)C)OC(=O)CCC\C=C/C\C=C/C\C=C/C\C=C/CCCCC;[H][C@@](CO[*])(COP([O-])(=O)OCC[N+](C)(C)C)O[*];	InChI=1S/C44H80NO7P/c1-6-8-10-12-14-16-18-20-22-23-24-25-27-29-31-33-35-37-44(46)52-43(42-51-53(47,48)50-40-38-45(3,4)5)41-49-39-36-34-32-30-28-26-21-19-17-15-13-11-9-7-2/h14,16,20,22,24-25,29,31,36,39,43H,6-13,15,17-19,21,23,26-28,30,32-35,37-38,40-42H2,1-5H3/b16-14-,22-20-,25-24-,31-29-,39-36-/t43-/m1/s1;InChI=1S/C44H80NO7P/c1-6-8-10-12-14-16-18-20-22-23-24-25-27-29-31-33-35-37-44(46)52-43(42-5…	PC ae C36:5	O-PC	[M+H]+	766.6	184	125	10	41	15
LMSD:LMGP01020060; LMSD:LMGP01020097; LMSD:LMGP01020099	C46H94NO7P	[H][C@@](COCCCCCCCCCCCCCCCC)(COP([O-])(=O)OCC[N+](C)(C)C)OC(=O)CCCCCCCCCCCCCCCCCCCCC;[H][C@@](COCCCCCCCCCCCCCCCCCC)(COP([O-])(=O)OCC[N+](C)(C)C)OC(=O)CCCCCCCCCCCCCCCCCCC;[H][C@@](CO[*])(COP([O-])(=O)OCC[N+](C)(C)C)O[*]	InChI=1S/C46H94NO7P/c1-6-8-10-12-14-16-18-20-22-23-24-25-26-27-29-31-33-35-37-39-46(48)54-45(44-53-55(49,50)52-42-40-47(3,4)5)43-51-41-38-36-34-32-30-28-21-19-17-15-13-11-9-7-2/h45H,6-44H2,1-5H3/t45-/m1/s1;InChI=1S/C46H94NO7P/c1-6-8-10-12-14-16-18-20-22-24-25-27-29-31-33-35-37-39-46(48)54-45(44-53-55(49,50)52-42-40-47(3,4)5)43-51-41-38-36-34-32-30-28-26-23-21-19-17-15-13-11-9-7-2/h45H,6-44H2,1-5H…	PC ae C38:0	O-PC	[M+H]+	804.7	184	135	10	44	15
LMSD:LMGP01020210; LMSD:LMGP01020260; LMSD:LMGP01020265	C46H92NO7P	CCCCCCCCCCCCCCCCCCOC[C@H](COP([O-])(=O)OCC[N+](C)(C)C)OC(=O)CCCCCCC\C=C/CCCCCCCCCC;[H][C@@](COCCCCCCCCCCCCCCCC)(COP([O-])(=O)OCC[N+](C)(C)C)OC(=O)CCCCCCCCCCCCCCCCCCCCC;[H][C@@](COCCCCCCCCCCCCCCCCCC)(COP([O-])(=O)OCC[N+](C)(C)C)OC(=O)CCCCCCCCCCCCCCCCCCC;[H][C@@](CO[*])(COP([O-])(=O)OCC[N+](C)(C)C)O[*];	InChI=1S/C46H92NO7P/c1-6-8-10-12-14-16-18-20-22-24-25-27-29-31-33-35-37-39-46(48)54-45(44-53-55(49,50)52-42-40-47(3,4)5)43-51-41-38-36-34-32-30-28-26-23-21-19-17-15-13-11-9-7-2/h24-25,45H,6-23,26-44H2,1-5H3/b25-24-/t45-/m1/s1;InChI=1S/C46H94NO7P/c1-6-8-10-12-14-16-18-20-22-23-24-25-26-27-29-31-33-35-37-39-46(48)54-45(44-53-55(49,50)52-42-40-47(3,4)5)43-51-41-38-36-34-32-30-28-21-19-17-15-13-11-9-…	PC ae C38:1	O-PC	[M+H]+	802.7	184	134	10	44	15
LMSD:LMGP01020211; LMSD:LMGP01020266; LMSD:LMGP01020271	C46H90NO7P	CCCCCCCCCCCCCCCCCCCC(=O)O[C@]([H])(COCCCCCCCC\C=C/CCCCCCCC)COP([O-])(=O)OCC[N+](C)(C)C;CCCCCCCCCCCCCCCCCCCCCC(=O)O[C@]([H])(COCCCCCCCC\C=C/CCCCCC)COP([O-])(=O)OCC[N+](C)(C)C;CCCCCCCCCCCCCCCCCCOC[C@H](COP([O-])(=O)OCC[N+](C)(C)C)OC(=O)CCCCCCCCC\C=C/C\C=C/CCCCC;[H][C@@](CO[*])(COP([O-])(=O)OCC[N+](C)(C)C)O[*];	InChI=1S/C46H90NO7P/c1-6-8-10-12-14-16-18-20-22-24-25-27-29-31-33-35-37-39-46(48)54-45(44-53-55(49,50)52-42-40-47(3,4)5)43-51-41-38-36-34-32-30-28-26-23-21-19-17-15-13-11-9-7-2/h14,16,20,22,45H,6-13,15,17-19,21,23-44H2,1-5H3/b16-14-,22-20-/t45-/m1/s1;InChI=1S/C46H92NO7P/c1-6-8-10-12-14-16-18-20-22-23-24-25-26-27-29-31-33-35-37-39-46(48)54-45(44-53-55(49,50)52-42-40-47(3,4)5)43-51-41-38-36-34-32-3…	PC ae C38:2	O-PC	[M+H]+	800.7	184	133	10	43	15
LMSD:LMGP01020102	C46H88NO7P	CCCCCCCCCCCCCCCCCCCC(=O)O[C@]([H])(COCCCCCCCC\C=C/C\C=C/CCCCC)COP([O-])(=O)OCC[N+](C)(C)C;CCCCCCCCCCCCCCCCCCOC[C@H](COP([O-])(=O)OCC[N+](C)(C)C)OC(=O)CCCCCC\C=C/C\C=C/C\C=C/CCCCC;CCCCCCCC\C=C/CCCCCCCCCC(=O)O[C@]([H])(COCCCCCCCC\C=C/CCCCCCCC)COP([O-])(=O)OCC[N+](C)(C)C;[H][C@@](CO[*])(COP([O-])(=O)OCC[N+](C)(C)C)O[*];	InChI=1S/C46H88NO7P/c1-6-8-10-12-14-16-18-20-22-24-25-27-29-31-33-35-37-39-46(48)54-45(44-53-55(49,50)52-42-40-47(3,4)5)43-51-41-38-36-34-32-30-28-26-23-21-19-17-15-13-11-9-7-2/h14,16,20,22,25,27,45H,6-13,15,17-19,21,23-24,26,28-44H2,1-5H3/b16-14-,22-20-,27-25-/t45-/m1/s1;InChI=1S/C46H90NO7P/c1-6-8-10-12-14-16-18-20-22-24-25-27-29-31-33-35-37-39-46(48)54-45(44-53-55(49,50)52-42-40-47(3,4)5)43-51-…	PC ae C38:3	O-PC	[M+H]+	798.6	184	133	10	43	15
LMSD:LMGP01020157; LMSD:LMGP01030012	C46H86NO7P	CCCCCCCCCCCCCCCCCCOC[C@]([H])(COP([O-])(=O)OCC[N+](C)(C)C)OC(=O)CCC\C=C/C\C=C/C\C=C/C\C=C/CCCCC;[H][C@@](COC)(COP([O-])(=O)OCC[N+](C)(C)C)OC;	InChI=1S/C46H86NO7P/c1-6-8-10-12-14-16-18-20-22-24-25-27-29-31-33-35-37-39-46(48)54-45(44-53-55(49,50)52-42-40-47(3,4)5)43-51-41-38-36-34-32-30-28-26-23-21-19-17-15-13-11-9-7-2/h14,16,20,22,25,27,31,33,45H,6-13,15,17-19,21,23-24,26,28-30,32,34-44H2,1-5H3/b16-14-,22-20-,27-25-,33-31-/t45-/m1/s1	PC ae C38:4	O-PC	[M+H]+	796.6	184	133	10	43	15
LMSD:LMGP01020064	C46H84NO7P	CCCCCCCCCCCCCCCC\C=C/OC[C@]([H])(COP([O-])(=O)OCC[N+](C)(C)C)OC(=O)CCC\C=C/C\C=C/C\C=C/C\C=C/CCCCC;CCCCCCCC\C=C/CCCCCCCCOC[C@]([H])(COP([O-])(=O)OCC[N+](C)(C)C)OC(=O)CCC\C=C/C\C=C/C\C=C/C\C=C/CCCCC;[H][C@@](COC)(COP([O-])(=O)OCC[N+](C)(C)C)OC	InChI=1S/C46H84NO7P/c1-6-8-10-12-14-16-18-20-22-24-25-27-29-31-33-35-37-39-46(48)54-45(44-53-55(49,50)52-42-40-47(3,4)5)43-51-41-38-36-34-32-30-28-26-23-21-19-17-15-13-11-9-7-2/h14,16,20,22,25,27,31,33,38,41,45H,6-13,15,17-19,21,23-24,26,28-30,32,34-37,39-40,42-44H2,1-5H3/b16-14-,22-20-,27-25-,33-31-,41-38-/t45-/m1/s1;InChI=1S/C46H84NO7P/c1-6-8-10-12-14-16-18-20-22-24-25-27-29-31-33-35-37-39-46(4…	PC ae C38:5	O-PC	[M+H]+	794.6	184	132	10	43	15
LMSD:LMGP01020213; LMSD:LMGP01020268	C46H82NO7P	CCCCCCCCCCCCCCCCOC[C@]([H])(COP([O-])(=O)OCC[N+](C)(C)C)OC(=O)CC\C=C/C\C=C/C\C=C/C\C=C/C\C=C/C\C=C/CC;[H][C@@](COC)(COP([O-])(=O)OCC[N+](C)(C)C)OC;	InChI=1S/C46H82NO7P/c1-6-8-10-12-14-16-18-20-22-23-24-25-26-27-29-31-33-35-37-39-46(48)54-45(44-53-55(49,50)52-42-40-47(3,4)5)43-51-41-38-36-34-32-30-28-21-19-17-15-13-11-9-7-2/h8,10,14,16,20,22,24-25,27,29,33,35,45H,6-7,9,11-13,15,17-19,21,23,26,28,30-32,34,36-44H2,1-5H3/b10-8-,16-14-,22-20-,25-24-,29-27-,35-33-/t45-/m1/s1	PC ae C38:6	O-PC	[M+H]+	792.6	184	132	10	43	15
LMSD:LMGP01020214; LMSD:LMGP01020272	C48H96NO7P	CCCCCCCCCCCCCCCCCCCCCC(=O)O[C@]([H])(COCCCCCCCC\C=C/CCCCCCCC)COP([O-])(=O)OCC[N+](C)(C)C;CCCCCCCCCCCCCCCCCCOC[C@H](COP([O-])(=O)OCC[N+](C)(C)C)OC(=O)CCCCCCCCC\C=C/CCCCCCCCCC;C[N+](C)(C)CCOP([O-])(=O)OC[C@@H](CO[*])O[*]	InChI=1S/C48H96NO7P/c1-6-8-10-12-14-16-18-20-22-24-25-26-27-29-31-33-35-37-39-41-48(50)56-47(46-55-57(51,52)54-44-42-49(3,4)5)45-53-43-40-38-36-34-32-30-28-23-21-19-17-15-13-11-9-7-2/h21,23,47H,6-20,22,24-46H2,1-5H3/b23-21-/t47-/m1/s1;InChI=1S/C48H96NO7P/c1-6-8-10-12-14-16-18-20-22-24-25-26-27-29-31-33-35-37-39-41-48(50)56-47(46-55-57(51,52)54-44-42-49(3,4)5)45-53-43-40-38-36-34-32-30-28-23-21-19…	PC ae C40:1	O-PC	[M+H]+	830.7	184	141	10	46	15
LMSD:LMGP01020237; LMSD:LMGP01020249	C48H94NO7P	CCCCCCCCCCCCCCCCCCCCCC(=O)O[C@]([H])(COCCCCCCCC\C=C/C\C=C/CCCCC)COP([O-])(=O)OCC[N+](C)(C)C;CCCCCCCCCCCCCCCCCCOC[C@H](COP([O-])(=O)OCC[N+](C)(C)C)OC(=O)CCCCCCCCCCC\C=C/C\C=C/CCCCC;C[N+](C)([CH2-])CCO[P+]([O-])(=O)OC[C@@H](CO[*])O[*]	InChI=1S/C48H94NO7P/c1-6-8-10-12-14-16-18-20-22-24-25-26-27-29-31-33-35-37-39-41-48(50)56-47(46-55-57(51,52)54-44-42-49(3,4)5)45-53-43-40-38-36-34-32-30-28-23-21-19-17-15-13-11-9-7-2/h14,16,20,22,47H,6-13,15,17-19,21,23-46H2,1-5H3/b16-14-,22-20-/t47-/m1/s1;InChI=1S/C48H94NO7P/c1-6-8-10-12-14-16-18-20-22-24-25-26-27-29-31-33-35-37-39-41-48(50)56-47(46-55-57(51,52)54-44-42-49(3,4)5)45-53-43-40-38-3…	PC ae C40:2	O-PC	[M+H]+	828.7	184	141	10	46	15
LMSD:LMGP01020215; LMSD:LMGP01020238	C48H92NO7P	CCCCCCCCCCCCCCCCCCCCCCOC[C@]([H])(COP([O-])(=O)OCC[N+](C)(C)C)OC(=O)CCCCCCC\C=C/C\C=C/C\C=C/CC;CCCCCCCCCCCCCCCCCCCCCCOC[C@]([H])(COP([O-])(=O)OCC[N+](C)(C)C)OC(=O)CCCC\C=C/C\C=C/C\C=C/CCCCC;CCCCCCCCCCCCCCCCCCCCOC[C@H](COP([O-])(=O)OCC[N+](C)(C)C)OC(=O)CCCCCC\C=C/C\C=C/C\C=C/CCCCC;C[N+](C)(C)CCOP([O-])(=O)OC[C@@H](CO[*])O[*];	InChI=1S/C48H92NO7P/c1-6-8-10-12-14-16-18-20-22-23-24-25-26-28-30-32-34-36-38-40-43-53-45-47(46-55-57(51,52)54-44-42-49(3,4)5)56-48(50)41-39-37-35-33-31-29-27-21-19-17-15-13-11-9-7-2/h15,17,21,27,31,33,47H,6-14,16,18-20,22-26,28-30,32,34-46H2,1-5H3/b17-15-,27-21-,33-31-/t47-/m1/s1;InChI=1S/C48H92NO7P/c1-6-8-10-12-14-16-18-20-22-23-24-25-26-28-30-32-34-36-38-40-43-53-45-47(46-55-57(51,52)54-44-42-…	PC ae C40:3	O-PC	[M+H]+	826.7	184	140	10	46	15
LMSD:LMGP01020107	C48H90NO7P	CCCCCCCCCCCCCCCCCCCCOC[C@]([H])(COP([O-])(=O)OCC[N+](C)(C)C)OC(=O)CCC\C=C/C\C=C/C\C=C/C\C=C/CCCCC;CCCCCCCCCCCCCCCCCCOC[C@H](COP([O-])(=O)OCC[N+](C)(C)C)OC(=O)CCCCC\C=C/C\C=C/C\C=C/C\C=C/CCCCC;C[N+](C)(C)CCOP([O-])(=O)OC[C@@H](CO[*])O[*]	InChI=1S/C48H90NO7P/c1-6-8-10-12-14-16-18-20-22-24-25-26-27-29-31-33-35-37-39-41-48(50)56-47(46-55-57(51,52)54-44-42-49(3,4)5)45-53-43-40-38-36-34-32-30-28-23-21-19-17-15-13-11-9-7-2/h14,16,20,22,25-26,29,31,47H,6-13,15,17-19,21,23-24,27-28,30,32-46H2,1-5H3/b16-14-,22-20-,26-25-,31-29-/t47-/m1/s1;InChI=1S/C48H90NO7P/c1-6-8-10-12-14-16-18-20-22-24-26-28-30-32-34-36-38-40-43-53-45-47(46-55-57(51,52…	PC ae C40:4	O-PC	[M+H]+	824.7	184	140	10	45	15
LMSD:LMGP01020110	C48H88NO7P	CCCCCCCCCCCCCCCCCCOC[C@H](COP([O-])(=O)OCC[N+](C)(C)C)OC(=O)CC\C=C/C\C=C/C\C=C/C\C=C/C\C=C/CCCCC;CCCCCCCC\C=C/CCCCCCCCCCOC[C@]([H])(COP([O-])(=O)OCC[N+](C)(C)C)OC(=O)CCC\C=C/C\C=C/C\C=C/C\C=C/CCCCC;C[N+](C)(C)CCOP([O-])(=O)OC[C@@H](CO[*])O[*]	InChI=1S/C48H88NO7P/c1-6-8-10-12-14-16-18-20-22-24-25-26-27-29-31-33-35-37-39-41-48(50)56-47(46-55-57(51,52)54-44-42-49(3,4)5)45-53-43-40-38-36-34-32-30-28-23-21-19-17-15-13-11-9-7-2/h14,16,20,22,25-26,29,31,35,37,47H,6-13,15,17-19,21,23-24,27-28,30,32-34,36,38-46H2,1-5H3/b16-14-,22-20-,26-25-,31-29-,37-35-/t47-/m1/s1;InChI=1S/C48H88NO7P/c1-6-8-10-12-14-16-18-20-22-24-26-28-30-32-34-36-38-40-43-5…	PC ae C40:5	O-PC	[M+H]+	822.6	184	139	10	45	15
	C48H86NO7P	CCCCCCCCCCCCCCCCCCOC[C@]([H])(COP([O-])(=O)OCC[N+](C)(C)C)OC(=O)CC\C=C/C\C=C/C\C=C/C\C=C/C\C=C/C\C=C/CC;[H][C@@](COC)(COP([O-])(=O)OCC[N+](C)(C)C)OC;	InChI=1S/C48H86NO7P/c1-6-8-10-12-14-16-18-20-22-24-25-26-27-29-31-33-35-37-39-41-48(50)56-47(46-55-57(51,52)54-44-42-49(3,4)5)45-53-43-40-38-36-34-32-30-28-23-21-19-17-15-13-11-9-7-2/h8,10,14,16,20,22,25-26,29,31,35,37,47H,6-7,9,11-13,15,17-19,21,23-24,27-28,30,32-34,36,38-46H2,1-5H3/b10-8-,16-14-,22-20-,26-25-,31-29-,37-35-/t47-/m1/s1	PC ae C40:6	O-PC	[M+H]+	820.6	184	139	10	45	15
LMSD:LMGP01020241; LMSD:LMGP01020250; LMSD:LMGP01020269	C50H102NO7P	[H][C@@](COCCCCCCCCCCCCCCCCCC)(COP([O-])(=O)OCC[N+](C)(C)C)OC(=O)CCCCCCCCCCCCCCCCCCCCCCC	InChI=1S/C50H102NO7P/c1-6-8-10-12-14-16-18-20-22-24-25-26-27-28-29-31-33-35-37-39-41-43-50(52)58-49(48-57-59(53,54)56-46-44-51(3,4)5)47-55-45-42-40-38-36-34-32-30-23-21-19-17-15-13-11-9-7-2/h49H,6-48H2,1-5H3/t49-/m1/s1	PC ae C42:0	O-PC	[M+H]+	860.8	184	150	10	49	15
LMSD:LMGP01020242; LMSD:LMGP01020273	C50H100NO7P	CCCCCCCCCCCCCCCCCCCCCCCC(=O)O[C@]([H])(COCCCCCCCC\C=C/CCCCCCCC)COP([O-])(=O)OCC[N+](C)(C)C;CCCCCCCCCCCCCCCCCCCCCCOC[C@]([H])(COP([O-])(=O)OCC[N+](C)(C)C)OC(=O)CCCCCCCCC\C=C/CCCCCCCC;CCCCCCCCCCCCCCCCCCCCOC[C@H](COP([O-])(=O)OCC[N+](C)(C)C)OC(=O)CCCCCCCCC\C=C/CCCCCCCCCC;C[N+](C)(C)CCOP([O-])(=O)OC[C@@H](CO[*])O[*];	InChI=1S/C50H100NO7P/c1-6-8-10-12-14-16-18-20-22-24-25-26-27-28-29-31-33-35-37-39-41-43-50(52)58-49(48-57-59(53,54)56-46-44-51(3,4)5)47-55-45-42-40-38-36-34-32-30-23-21-19-17-15-13-11-9-7-2/h21,23,49H,6-20,22,24-48H2,1-5H3/b23-21-/t49-/m1/s1;InChI=1S/C50H100NO7P/c1-6-8-10-12-14-16-18-20-22-24-25-26-28-30-32-34-36-38-40-42-45-55-47-49(48-57-59(53,54)56-46-44-51(3,4)5)58-50(52)43-41-39-37-35-33-31-…	PC ae C42:1	O-PC	[M+H]+	858.7	184	141	10	46	15
LMSD:LMGP01020252; LMSD:LMGP01020253	C50H98NO7P	CCCCCCCCCCCCCCCCCCCCCCCC(=O)O[C@]([H])(COCCCCCCCC\C=C/C\C=C/CCCCC)COP([O-])(=O)OCC[N+](C)(C)C;CCCCCCCCCCCCCCCCCCCCOC[C@H](COP([O-])(=O)OCC[N+](C)(C)C)OC(=O)CCCCCCCCCCC\C=C/C\C=C/CCCCC;C[N+](C)(C)CCOP([O-])(=O)OC[C@@H](CO[*])O[*]	InChI=1S/C50H98NO7P/c1-6-8-10-12-14-16-18-20-22-24-25-26-27-28-29-31-33-35-37-39-41-43-50(52)58-49(48-57-59(53,54)56-46-44-51(3,4)5)47-55-45-42-40-38-36-34-32-30-23-21-19-17-15-13-11-9-7-2/h15,17,21,23,49H,6-14,16,18-20,22,24-48H2,1-5H3/b17-15-,23-21-/t49-/m1/s1;InChI=1S/C50H98NO7P/c1-6-8-10-12-14-16-18-20-22-24-26-27-29-31-33-35-37-39-41-43-50(52)58-49(48-57-59(53,54)56-46-44-51(3,4)5)47-55-45-4…	PC ae C42:2	O-PC	[M+H]+	856.7	184	149	10	48	15
LMSD:LMGP01020243	C50H96NO7P	CCCCCCCCCCCCCCCCCCCCCCCCOC[C@]([H])(COP([O-])(=O)OCC[N+](C)(C)C)OC(=O)CCCCCCC\C=C/C\C=C/C\C=C/CC;CCCCCCCCCCCCCCCCCCCCCCCCOC[C@]([H])(COP([O-])(=O)OCC[N+](C)(C)C)OC(=O)CCCC\C=C/C\C=C/C\C=C/CCCCC;C[N+](C)(C)CCOP([O-])(=O)OC[C@@H](CO[*])O[*]	InChI=1S/C50H96NO7P/c1-6-8-10-12-14-16-18-20-22-23-24-25-26-27-28-30-32-34-36-38-40-42-45-55-47-49(48-57-59(53,54)56-46-44-51(3,4)5)58-50(52)43-41-39-37-35-33-31-29-21-19-17-15-13-11-9-7-2/h15,17,21,29,33,35,49H,6-14,16,18-20,22-28,30-32,34,36-48H2,1-5H3/b17-15-,29-21-,35-33-/t49-/m1/s1;InChI=1S/C50H96NO7P/c1-6-8-10-12-14-16-18-20-22-23-24-25-26-27-28-30-32-34-36-38-40-42-45-55-47-49(48-57-59(53,…	PC ae C42:3	O-PC	[M+H]+	854.7	184	148	10	48	15
	C50H94NO7P	CCCCCCCCCCCCCCCCCCCCCCOC[C@]([H])(COP([O-])(=O)OCC[N+](C)(C)C)OC(=O)CCC\C=C/C\C=C/C\C=C/C\C=C/CCCCC;CCCCCCCCCCCCCCCCCCCCOC[C@H](COP([O-])(=O)OCC[N+](C)(C)C)OC(=O)CCCCC\C=C/C\C=C/C\C=C/C\C=C/CCCCC;CCCCC\C=C/C\C=C/CCCCCCCCCCCCOC[C@]([H])(COP([O-])(=O)OCC[N+](C)(C)C)OC(=O)CCCCCCCCC\C=C/C\C=C/CCCCC;C[N+](C)(C)CCOP([O-])(=O)OC[C@@H](CO[*])O[*];	InChI=1S/C50H94NO7P/c1-6-8-10-12-14-16-18-20-22-24-25-26-28-30-32-34-36-38-40-42-45-55-47-49(48-57-59(53,54)56-46-44-51(3,4)5)58-50(52)43-41-39-37-35-33-31-29-27-23-21-19-17-15-13-11-9-7-2/h14-17,20-23,49H,6-13,18-19,24-48H2,1-5H3/b16-14-,17-15-,22-20-,23-21-/t49-/m1/s1;InChI=1S/C50H94NO7P/c1-6-8-10-12-14-16-18-20-22-24-25-26-28-30-32-34-36-38-40-42-45-55-47-49(48-57-59(53,54)56-46-44-51(3,4)5)58…	PC ae C42:4	O-PC	[M+H]+	852.7	184	148	10	48	15
LMSD:LMGP01020251; LMSD:LMGP01020275	C50H92NO7P	CCCCCCCC\C=C/CCCCCCCCCCCCOC[C@]([H])(COP([O-])(=O)OCC[N+](C)(C)C)OC(=O)CCC\C=C/C\C=C/C\C=C/C\C=C/CCCCC;C[N+](C)(C)CCOP([O-])(=O)OC[C@@H](CO[*])O[*];	InChI=1S/C50H92NO7P/c1-6-8-10-12-14-16-18-20-22-24-25-26-28-30-32-34-36-38-40-42-45-55-47-49(48-57-59(53,54)56-46-44-51(3,4)5)58-50(52)43-41-39-37-35-33-31-29-27-23-21-19-17-15-13-11-9-7-2/h15,17,20-23,29,31,35,37,49H,6-14,16,18-19,24-28,30,32-34,36,38-48H2,1-5H3/b17-15-,22-20-,23-21-,31-29-,37-35-/t49-/m1/s1	PC ae C42:5	O-PC	[M+H]+	850.7	184	147	10	48	15
LMSD:LMGP01020254; LMSD:LMGP01020276; LMSD:LMGP01020277	C52H100NO7P	CCCCCCCCCCCCCCCCCCCCCCOC[C@]([H])(COP([O-])(=O)OCC[N+](C)(C)C)OC(=O)CCCCCCCC\C=C/C\C=C/C\C=C/CCCCC;CCCCCCCC\C=C/CCCCCCCCCCCCOC[C@]([H])(COP([O-])(=O)OCC[N+](C)(C)C)OC(=O)CCCCCCCCCCC\C=C/C\C=C/CCCCC;[H][C@@](CO[*])(COP([O-])(=O)OCC[N+](C)(C)C)O[*]	InChI=1S/C52H100NO7P/c1-6-8-10-12-14-16-18-20-22-24-26-28-30-32-34-36-38-40-42-44-47-57-49-51(50-59-61(55,56)58-48-46-53(3,4)5)60-52(54)45-43-41-39-37-35-33-31-29-27-25-23-21-19-17-15-13-11-9-7-2/h15,17,20-23,51H,6-14,16,18-19,24-50H2,1-5H3/b17-15-,22-20-,23-21-/t51-/m1/s1;InChI=1S/C52H100NO7P/c1-6-8-10-12-14-16-18-20-22-24-26-28-30-32-34-36-38-40-42-44-47-57-49-51(50-59-61(55,56)58-48-46-53(3,4)…	PC ae C44:3	O-PC	[M+H]+	882.7	184	156	10	51	15
LMSD:LMGP01020278	C52H98NO7P	CCCCCCCCCCCCCCCCCCCCCCCCOC[C@H](COP([O-])(=O)OCC[N+](C)(C)C)OC(=O)CCCCCC\C=C/C\C=C/C\C=C/C\C=C/CC;CCCCCCCCCCCCCCCCCCCCCCCCOC[C@]([H])(COP([O-])(=O)OCC[N+](C)(C)C)OC(=O)CCC\C=C/C\C=C/C\C=C/C\C=C/CCCCC;CCCCCCCC\C=C/CCCCCCCCCCCCOC[C@]([H])(COP([O-])(=O)OCC[N+](C)(C)C)OC(=O)CCCCCCCC\C=C/C\C=C/C\C=C/CCCCC;CCCCC\C=C/C\C=C/CCCCCCCCCCCCOC[C@]([H])(COP([O-])(=O)OCC[N+](C)(C)C)OC(=O)CCCCCCCCCCC\C=C/C\C=C/C…	InChI=1S/C52H98NO7P/c1-6-8-10-12-14-16-18-20-22-24-25-26-27-28-30-32-34-36-38-40-42-44-47-57-49-51(50-59-61(55,56)58-48-46-53(3,4)5)60-52(54)45-43-41-39-37-35-33-31-29-23-21-19-17-15-13-11-9-7-2/h15,17,21,23,31,33,37,39,51H,6-14,16,18-20,22,24-30,32,34-36,38,40-50H2,1-5H3/b17-15-,23-21-,33-31-,39-37-/t51-/m1/s1;InChI=1S/C52H98NO7P/c1-6-8-10-12-14-16-18-20-22-24-25-26-27-28-30-32-34-36-38-40-42-44…	PC ae C44:4	O-PC	[M+H]+	880.7	184	156	10	51	15
	C52H96NO7P	CCCCC\C=C/C\C=C/CCCCCCCCCCCCOC[C@]([H])(COP([O-])(=O)OCC[N+](C)(C)C)OC(=O)CCCCCCCC\C=C/C\C=C/C\C=C/CCCCC;[H][C@@](CO[*])(COP([O-])(=O)OCC[N+](C)(C)C)O[*];	InChI=1S/C52H96NO7P/c1-6-8-10-12-14-16-18-20-22-24-26-28-30-32-34-36-38-40-42-44-47-57-49-51(50-59-61(55,56)58-48-46-53(3,4)5)60-52(54)45-43-41-39-37-35-33-31-29-27-25-23-21-19-17-15-13-11-9-7-2/h14-17,20-23,27,29,51H,6-13,18-19,24-26,28,30-50H2,1-5H3/b16-14-,17-15-,22-20-,23-21-,29-27-/t51-/m1/s1	PC ae C44:5	O-PC	[M+H]+	878.7	184	155	10	51	15
LMSD:LMSP0501AB12	C52H94NO7P	CCCCCCCCCCCCCCCCCCCCCCOC[C@]([H])(COP([O-])(=O)OCC[N+](C)(C)C)OC(=O)CC\C=C/C\C=C/C\C=C/C\C=C/C\C=C/C\C=C/CC;CCCCC\C=C/C\C=C/C\C=C/CCCCCCCCCOC[C@]([H])(COP([O-])(=O)OCC[N+](C)(C)C)OC(=O)CCCCCCCC\C=C/C\C=C/C\C=C/CCCCC;[H][C@@](CO[*])(COP([O-])(=O)OCC[N+](C)(C)C)O[*]	InChI=1S/C52H94NO7P/c1-6-8-10-12-14-16-18-20-22-24-26-28-30-32-34-36-38-40-42-44-47-57-49-51(50-59-61(55,56)58-48-46-53(3,4)5)60-52(54)45-43-41-39-37-35-33-31-29-27-25-23-21-19-17-15-13-11-9-7-2/h14-17,20-23,26-29,51H,6-13,18-19,24-25,30-50H2,1-5H3/b16-14-,17-15-,22-20-,23-21-,28-26-,29-27-/t51-/m1/s1;InChI=1S/C52H94NO7P/c1-6-8-10-12-14-16-18-20-22-24-26-28-30-32-34-36-38-40-42-44-47-57-49-51(50-…	PC ae C44:6	O-PC	[M+H]+	876.7	184	154	10	50	15
	C37H73N2O7P	CCCCCCCCCCCCC\C=C\[C@@H](O)[C@H](COP([O-])(=O)OCC[N+](C)(C)C)NC(=O)CC(O)CCCCC\C=C/CCCC;CCCCCCCCCCCCC\C=C\[C@@H](O)[C@H](COP([O-])(=O)OCC[N+](C)(C)C)NC([*])=O;	InChI=1S/C37H73N2O7P/c1-6-8-10-12-14-16-17-18-19-21-23-25-27-29-36(41)35(33-46-47(43,44)45-31-30-39(3,4)5)38-37(42)32-34(40)28-26-24-22-20-15-13-11-9-7-2/h13,15,27,29,34-36,40-41H,6-12,14,16-26,28,30-33H2,1-5H3,(H-,38,42,43,44)/b15-13-,29-27+/t34?,35-,36+/m0/s1	SM (OH) C14:1	SM	[M+H]+	689.6	184	108	10	36	15
	C39H77N2O7P	CCCCCCCCCCCCC\C=C\[C@@H](O)[C@H](COP([O-])(=O)OCC[N+](C)(C)C)NC(=O)CC(O)CCCCC\C=C/CCCCCC;CCCCCCCCCCCCC\C=C\[C@@H](O)[C@H](COP([O-])(=O)OCC[N+](C)(C)C)NC([*])=O;	InChI=1S/C39H77N2O7P/c1-6-8-10-12-14-16-18-19-21-23-25-27-29-31-38(43)37(35-48-49(45,46)47-33-32-41(3,4)5)40-39(44)34-36(42)30-28-26-24-22-20-17-15-13-11-9-7-2/h17,20,29,31,36-38,42-43H,6-16,18-19,21-28,30,32-35H2,1-5H3,(H-,40,44,45,46)/b20-17-,31-29+/t36?,37-,38+/m0/s1	SM (OH) C16:1	SM	[M+H]+	717.6	184	114	10	38	15
	C45H89N2O7P	CCCCCCCCCCCCC\C=C\[C@@H](O)[C@H](COP([O-])(=O)OCC[N+](C)(C)C)NC(=O)CC(O)CCCCCCCCC\C=C/CCCCCCCC;CCCCCCCCCCCCC\C=C\[C@@H](O)[C@H](COP([O-])(=O)OCC[N+](C)(C)C)NC([*])=O;	InChI=1S/C45H89N2O7P/c1-6-8-10-12-14-16-18-20-21-22-23-25-26-28-30-32-34-36-42(48)40-45(50)46-43(41-54-55(51,52)53-39-38-47(3,4)5)44(49)37-35-33-31-29-27-24-19-17-15-13-11-9-7-2/h20-21,35,37,42-44,48-49H,6-19,22-34,36,38-41H2,1-5H3,(H-,46,50,51,52)/b21-20-,37-35+/t42?,43-,44+/m0/s1	SM (OH) C22:1	SM	[M+H]+	801.7	184	134	10	43	15
	C45H87N2O7P	CCCCCCCCCCCCC\C=C\[C@@H](O)[C@H](COP([O-])(=O)OCC[N+](C)(C)C)NC(=O)CC(O)CCCCCCCCC\C=C/C\C=C/CCCCC;CCCCCCCCCCCCC\C=C\[C@@H](O)[C@H](COP([O-])(=O)OCC[N+](C)(C)C)NC([*])=O;	InChI=1S/C45H87N2O7P/c1-6-8-10-12-14-16-18-20-21-22-23-25-26-28-30-32-34-36-42(48)40-45(50)46-43(41-54-55(51,52)53-39-38-47(3,4)5)44(49)37-35-33-31-29-27-24-19-17-15-13-11-9-7-2/h14,16,20-21,35,37,42-44,48-49H,6-13,15,17-19,22-34,36,38-41H2,1-5H3,(H-,46,50,51,52)/b16-14-,21-20-,37-35+/t42?,43-,44+/m0/s1	SM (OH) C22:2	SM	[M+H]+	799.7	184	133	10	43	15
LMSD:LMSP03010003	C47H93N2O7P	CCCCCCCCCCCCC\C=C\[C@@H](O)[C@H](COP([O-])(=O)OCC[N+](C)(C)C)NC(=O)CC(O)CCCCCCCCCCC\C=C/CCCCCCCC;CCCCCCCCCCCCC\C=C\[C@@H](O)[C@H](COP([O-])(=O)OCC[N+](C)(C)C)NC([*])=O;	InChI=1S/C47H93N2O7P/c1-6-8-10-12-14-16-18-20-21-22-23-24-25-27-28-30-32-34-36-38-44(50)42-47(52)48-45(43-56-57(53,54)55-41-40-49(3,4)5)46(51)39-37-35-33-31-29-26-19-17-15-13-11-9-7-2/h20-21,37,39,44-46,50-51H,6-19,22-36,38,40-43H2,1-5H3,(H-,48,52,53,54)/b21-20-,39-37+/t44?,45-,46+/m0/s1	SM (OH) C24:1	SM	[M+H]+	829.7	184	141	10	46	15
LMSD:LMSP03010041	C39H79N2O6P	CCCCCCCCCCCCCCCC(=O)N[C@@H](COP([O-])(=O)OCC[N+](C)(C)C)[C@H](O)\C=C\CCCCCCCCCCCCC;CCCCCCCCCCCCCCCC(=O)N[C@@]([H])(COP(O)(=O)OCC[N+](C)(C)C)[C@]([H])(O)\C=C\CCCCCCCCCCCCC;	InChI=1S/C39H79N2O6P/c1-6-8-10-12-14-16-18-20-22-24-26-28-30-32-38(42)37(36-47-48(44,45)46-35-34-41(3,4)5)40-39(43)33-31-29-27-25-23-21-19-17-15-13-11-9-7-2/h30,32,37-38,42H,6-29,31,33-36H2,1-5H3,(H-,40,43,44,45)/b32-30+/t37-,38+/m0/s1;InChI=1S/C39H79N2O6P/c1-6-8-10-12-14-16-18-20-22-24-26-28-30-32-38(42)37(36-47-48(44,45)46-35-34-41(3,4)5)40-39(43)33-31-29-27-25-23-21-19-17-15-13-11-9-7-2/h30,32…	SM C16:0	SM	[M+H]+	703.6	184	112	10	37	15
LMSD:LMSP03010001	C39H77N2O6P	CCCCCCCCCCCCC\C=C\[C@@H](O)[C@H](COP([O-])(=O)OCC[N+](C)(C)C)NC(=O)CCCCCCC\C=C/CCCCCC;CCCCCCCCCCCCC\C=C\[C@@H](O)[C@H](COP([O-])(=O)OCC[N+](C)(C)C)NC([*])=O;	InChI=1S/C39H77N2O6P/c1-6-8-10-12-14-16-18-20-22-24-26-28-30-32-38(42)37(36-47-48(44,45)46-35-34-41(3,4)5)40-39(43)33-31-29-27-25-23-21-19-17-15-13-11-9-7-2/h17,19,30,32,37-38,42H,6-16,18,20-29,31,33-36H2,1-5H3,(H-,40,43,44,45)/b19-17-,32-30+/t37-,38+/m0/s1	SM C16:1	SM	[M+H]+	701.6	184	111	10	37	15
LMSD:LMSP03010029	C41H83N2O6P	CCCCCCCCCCCCCCCCCC(=O)N[C@@]([H])(COP(O)(=O)OCC[N+](C)(C)C)[C@]([H])(O)\C=C\CCCCCCCCCCCCC	InChI=1S/C41H83N2O6P/c1-6-8-10-12-14-16-18-20-21-23-25-27-29-31-33-35-41(45)42-39(38-49-50(46,47)48-37-36-43(3,4)5)40(44)34-32-30-28-26-24-22-19-17-15-13-11-9-7-2/h32,34,39-40,44H,6-31,33,35-38H2,1-5H3,(H-,42,45,46,47)/p+1/b34-32+/t39-,40+/m0/s1	SM C18:0	SM	[M+H]+	731.6	184	117	10	38	15
	C41H81N2O6P	CCCCCCCCCCCCC\C=C\[C@@H](O)[C@H](COP([O-])(=O)OCC[N+](C)(C)C)NC(=O)CCCCCCCCC\C=C/CCCCCC;CCCCCCCCCCCCC\C=C\[C@@H](O)[C@H](COP([O-])(=O)OCC[N+](C)(C)C)NC(=O)CCCCCCC\C=C/CCCCCCCC;[C@@H]([C@@H](/C=C/CCCCCCCCCCCCC)O)(COP(OCC[N+](C)(C)C)(=O)[O-])NC(=O)*	InChI=1S/C41H81N2O6P/c1-6-8-10-12-14-16-18-20-21-23-25-27-29-31-33-35-41(45)42-39(38-49-50(46,47)48-37-36-43(3,4)5)40(44)34-32-30-28-26-24-22-19-17-15-13-11-9-7-2/h16,18,32,34,39-40,44H,6-15,17,19-31,33,35-38H2,1-5H3,(H-,42,45,46,47)/b18-16-,34-32+/t39-,40+/m0/s1;InChI=1S/C41H81N2O6P/c1-6-8-10-12-14-16-18-20-21-23-25-27-29-31-33-35-41(45)42-39(38-49-50(46,47)48-37-36-43(3,4)5)40(44)34-32-30-28-26…	SM C18:1	SM	[M+H]+	729.6	184	117	10	38	15
	C43H83N2O6P	CCCCCCCCCCCCC\C=C\[C@@H](O)[C@H](COP([O-])(=O)OCC[N+](C)(C)C)NC([*])=O		SM C20:2	SM	[M+H]+	755.6	184	123	10	40	15
LMSD:LMSP03010008	C45H85N2O6P	CCCCCCCCCCCCC\C=C\[C@@H](O)[C@H](COP([O-])(=O)OCC[N+](C)(C)C)NC([*])=O		SM C22:3	SM	[M+H]+	781.6	184	129	10	42	15
LMSD:LMSP03010007	C47H95N2O6P	CCCCCCCCCCCCCCCCCCCCCCCC(=O)N[C@@]([H])(COP(O)(=O)OCC[N+](C)(C)C)[C@]([H])(O)\C=C\CCCCCCCCCCCCC	InChI=1S/C47H95N2O6P/c1-6-8-10-12-14-16-18-20-21-22-23-24-25-26-27-29-31-33-35-37-39-41-47(51)48-45(44-55-56(52,53)54-43-42-49(3,4)5)46(50)40-38-36-34-32-30-28-19-17-15-13-11-9-7-2/h38,40,45-46,50H,6-37,39,41-44H2,1-5H3,(H-,48,51,52,53)/p+1/b40-38+/t45-,46+/m0/s1	SM C24:0	SM	[M+H]+	815.7	184	137	10	45	15
LMSD:LMSP03010010	C47H93N2O6P	CCCCCCCCCCCCC\C=C\[C@@H](O)[C@H](COP([O-])(=O)OCC[N+](C)(C)C)NC(=O)CCCCCCCCCCCCC\C=C/CCCCCCCC;CCCCCCCCCCCCC\C=C\[C@@H](O)[C@H](COP([O-])(=O)OCC[N+](C)(C)C)NC([*])=O;	InChI=1S/C47H93N2O6P/c1-6-8-10-12-14-16-18-20-21-22-23-24-25-26-27-29-31-33-35-37-39-41-47(51)48-45(44-55-56(52,53)54-43-42-49(3,4)5)46(50)40-38-36-34-32-30-28-19-17-15-13-11-9-7-2/h20-21,38,40,45-46,50H,6-19,22-37,39,41-44H2,1-5H3,(H-,48,51,52,53)/b21-20-,40-38+/t45-,46+/m0/s1	SM C24:1	SM	[M+H]+	813.7	184	137	10	45	15
LMSD:LMSP03010009	C49H99N2O6P	CCCCCCCCCCCCCCCCCCCCCCCCCC(=O)N[C@@]([H])(COP(O)(=O)OCC[N+](C)(C)C)[C@]([H])(O)\C=C\CCCCCCCCCCCCC	InChI=1S/C49H99N2O6P/c1-6-8-10-12-14-16-18-20-21-22-23-24-25-26-27-28-29-31-33-35-37-39-41-43-49(53)50-47(46-57-58(54,55)56-45-44-51(3,4)5)48(52)42-40-38-36-34-32-30-19-17-15-13-11-9-7-2/h40,42,47-48,52H,6-39,41,43-46H2,1-5H3,(H-,50,53,54,55)/p+1/b42-40+/t47-,48+/m0/s1	SM C26:0	SM	[M+H]+	843.7	184	145	10	47	15
	C49H97N2O6P	CCCCCCCCCCCCC\C=C\[C@@H](O)[C@H](COP([O-])(=O)OCC[N+](C)(C)C)NC(=O)CCCCCCCCCCCCCCC\C=C/CCCCCCCC;CCCCCCCCCCCCC\C=C\[C@@H](O)[C@H](COP([O-])(=O)OCC[N+](C)(C)C)NC([*])=O;	InChI=1S/C49H97N2O6P/c1-6-8-10-12-14-16-18-20-21-22-23-24-25-26-27-28-29-31-33-35-37-39-41-43-49(53)50-47(46-57-58(54,55)56-45-44-51(3,4)5)48(52)42-40-38-36-34-32-30-19-17-15-13-11-9-7-2/h20-21,40,42,47-48,52H,6-19,22-39,41,43-46H2,1-5H3,(H-,50,53,54,55)/b21-20-,42-40+/t47-,48+/m0/s1	SM C26:1	SM	[M+H]+	841.7	184	144	10	47	15
CHEBI:17126	C7H15NO3	C[N+](C)(C)CC(O)CC([O-])=O;C[N+](C)(C)C[C@@H](O)CC([O-])=O;C[N+](C)(C)C[C@H](O)CC([O-])=O	InChI=1S/C7H15NO3/c1-8(2;3)5-6(9)4-7(10)11/h6;9H;4-5H2;1-3H3;InChI=1S/C7H15NO3/c1-8(2;3)5-6(9)4-7(10)11/h6;9H;4-5H2;1-3H3/t6-/m0/s1;InChI=1S/C7H15NO3/c1-8(2;3)5-6(9)4-7(10)11/h6;9H;4-5H2;1-3H3/t6-/m1/s1	C0	Acylcarnitines	[M+H]+	162.1	85.1	61	10	27	15
				D3-C0	Internal standard	[M+H]+	165.1	85.1	61	10	27	15
LMFA07070050	C9H17NO4	CC(=O)OC(CC([O-])=O)C[N+](C)(C)C;CC(=O)O[C@@H](CC([O-])=O)C[N+](C)(C)C;CC(=O)O[C@H](CC([O-])=O)C[N+](C)(C)C	InChI=1S/C9H17NO4/c1-7(11)14-8(5-9(12)13)6-10(2;3)4/h8H;5-6H2;1-4H3;InChI=1S/C9H17NO4/c1-7(11)14-8(5-9(12)13)6-10(2;3)4/h8H;5-6H2;1-4H3/t8-/m0/s1;InChI=1S/C9H17NO4/c1-7(11)14-8(5-9(12)13)6-10(2;3)4/h8H;5-6H2;1-4H3/t8-/m1/s1	C2	Acylcarnitines	[M+H]+	204.1	85.1	140	10	27	15
				D3-C2	Internal standard	[M+H]+	207.1	85.1	140	10	27	15
LMFA07070104	C10H17NO4	C[N+](C)(C)CC(CC([O-])=O)OC([*])=O;C[N+](C)(C)C[C@H](CC([O-])=O)OC(=O)C=C	InChI=1S/C10H17NO4/c1-5-10(14)15-8(6-9(12)13)7-11(2;3)4/h5;8H;1;6-7H2;2-4H3/t8-/m0/s1	C3:1	Acylcarnitines	[M+H]+	216.1	85.1	140	10	27	15
LMFA07070105	C10H19NO4	CCC(=O)OC(CC([O-])=O)C[N+](C)(C)C;	InChI=1S/C10H19NO4/c1-5-10(14)15-8(6-9(12)13)7-11(2;3)4/h8H;5-7H2;1-4H3	C3	Acylcarnitines	[M+H]+	218.1	85.1	140	10	29	15
LMFA07070053	C11H19NO4	C\C=C\C(=O)O[C@@H](CC([O-])=O)C[N+](C)(C)C;	InChI=1S/C11H19NO4/c1-5-6-11(15)16-9(7-10(13)14)8-12(2;3)4/h5-6;9H;7-8H2;1-4H3/b6-5+/t9-/m0/s1	C4:1	Acylcarnitines	[M+H]+	230.1	85.1	140	10	29	15
LMFA07070003	C11H21NO4	CC(C)C(=O)OC(CC([O-])=O)C[N+](C)(C)C;CC(C)C(=O)O[C@H](CC([O-])=O)C[N+](C)(C)C;CCCC(=O)OC(CC([O-])=O)C[N+](C)(C)C;CCCC(=O)O[C@H](CC([O-])=O)C[N+](C)(C)C	InChI=1S/C11H21NO4/c1-5-6-11(15)16-9(7-10(13)14)8-12(2;3)4/h9H;5-8H2;1-4H3;InChI=1S/C11H21NO4/c1-5-6-11(15)16-9(7-10(13)14)8-12(2;3)4/h9H;5-8H2;1-4H3/t9-/m1/s1;InChI=1S/C11H21NO4/c1-8(2)11(15)16-9(6-10(13)14)7-12(3;4)5/h8-9H;6-7H2;1-5H3;InChI=1S/C11H21NO4/c1-8(2)11(15)16-9(6-10(13)14)7-12(3;4)5/h8-9H;6-7H2;1-5H3/t9-/m1/s1	C4	Acylcarnitines	[M+H]+	232.2	85.1	140	10	29	15
				D3-C4	Internal standard	[M+H]+	235.2	85.1	140	10	29	15
LMFA07070074	C10H19NO5	C[N+](C)(C)C[C@H](CC([O-])=O)OC(=O)CCO;	InChI=1S/C10H19NO5/c1-11(2;3)7-8(6-9(13)14)16-10(15)4-5-12/h8;12H;4-7H2;1-3H3/t8-/m0/s1	C3-OH	Acylcarnitines	[M+H]+	234.1	85.1	140	10	30	15
LMFA07070030; LMFA07070108	C12H21NO4	C\C=C(/C)C(=O)O[C@H](CC([O-])=O)C[N+](C)(C)C;	InChI=1S/C12H21NO4/c1-6-9(2)12(16)17-10(7-11(14)15)8-13(3;4)5/h6;10H;7-8H2;1-5H3/b9-6+/t10-/m1/s1	C5:1	Acylcarnitines	[M+H]+	244.2	85.1	140	10	31	15
LMFA07070034	C12H23NO4	CC(C)(C)C(=O)OC(CC([O-])=O)C[N+](C)(C)C;CC(C)CC(=O)OC(CC([O-])=O)C[N+](C)(C)C;CCC(C)C(=O)OC(CC([O-])=O)C[N+](C)(C)C;CCCCC(=O)OC(CC([O-])=O)C[N+](C)(C)C;CCCCC(=O)O[C@H](CC(O)=O)C[N+](C)(C)C	InChI=1S/C12H23NO4/c1-12(2;3)11(16)17-9(7-10(14)15)8-13(4;5)6/h9H;7-8H2;1-6H3;InChI=1S/C12H23NO4/c1-5-6-7-12(16)17-10(8-11(14)15)9-13(2;3)4/h10H;5-9H2;1-4H3;InChI=1S/C12H23NO4/c1-5-6-7-12(16)17-10(8-11(14)15)9-13(2;3)4/h10H;5-9H2;1-4H3/p+1/t10-/m1/s1;InChI=1S/C12H23NO4/c1-6-9(2)12(16)17-10(7-11(14)15)8-13(3;4)5/h9-10H;6-8H2;1-5H3;InChI=1S/C12H23NO4/c1-9(2)6-12(16)17-10(7-11(14)15)8-13(3;4)5/h9-10…	C5	Acylcarnitines	[M+H]+	246.2	85.1	140	10	29	15
				D9-C5	Internal standard	[M+H]+	255.2	85.1	140	10	29	15
LMFA07070080	C10H17NO6	C[N+](C)(C)CC(CC([O-])=O)OC(=O)CC(O)=O;C[N+](C)(C)C[C@@H](CC([O-])=O)OC(=O)CC(O)=O	InChI=1S/C10H17NO6/c1-11(2;3)6-7(4-8(12)13)17-10(16)5-9(14)15/h7H;4-6H2;1-3H3;(H-;12;13;14;15);InChI=1S/C10H17NO6/c1-11(2;3)6-7(4-8(12)13)17-10(16)5-9(14)15/h7H;4-6H2;1-3H3;(H-;12;13;14;15)/t7-/m1/s1	C3-DC (C4-OH)	Acylcarnitines	[M+H]+	248.1	85.1	140	10	32	15
LMFA07070031	C13H23NO4	CCC\C=C\C(=O)OC(CC([O-])=O)C[N+](C)(C)C;	InChI=1S/C13H23NO4/c1-5-6-7-8-13(17)18-11(9-12(15)16)10-14(2;3)4/h7-8;11H;5-6;9-10H2;1-4H3/b8-7+	C6:1	Acylcarnitines	[M+H]+	258.2	85.1	140	10	33	15
LMFA07070001	C13H25NO4	CCCCCC(=O)OC(CC([O-])=O)C[N+](C)(C)C;CCCCCC(=O)O[C@H](CC([O-])=O)C[N+](C)(C)C	InChI=1S/C13H25NO4/c1-5-6-7-8-13(17)18-11(9-12(15)16)10-14(2;3)4/h11H;5-10H2;1-4H3;InChI=1S/C13H25NO4/c1-5-6-7-8-13(17)18-11(9-12(15)16)10-14(2;3)4/h11H;5-10H2;1-4H3/t11-/m1/s1	C6 (C4:1-DC)	Acylcarnitines	[M+H]+	260.2	85.1	140	10	27	15
				D3-C6	Internal standard	[M+H]+	263.2	85.1	140	10	27	15
LMFA07070081	C12H23NO5	CC(C(O)=O)C(=O)O[C@@H](CC([O-])=O)C[N+](C)(C)C;CCC(O)CC(O)O[C@@H](CC([O-])=O)C[N+](C)(C)C;C[N+](C)(C)CC(CC([O-])=O)OC([*])=O	InChI=1S/C11H19NO6/c1-7(10(15)16)11(17)18-8(5-9(13)14)6-12(2;3)4/h7-8H;5-6H2;1-4H3;(H-;13;14;15;16)/t7?;8-/m0/s1;InChI=1S/C12H25NO5/c1-5-9(14)6-12(17)18-10(7-11(15)16)8-13(2;3)4/h9-10;12;14;17H;5-8H2;1-4H3/t9?;10-;12?/m0/s1	C5-OH (C3-DC-M)	Acylcarnitines	[M+H]+	262.2	85.1	140	10	33	15
LMFA07070065	C12H19NO6	C[N+](C)(C)CC(CC([O-])=O)OC(=O)\C=C\CC(O)=O;OC(=O)C\C=C\C(=O)O[C@@H](CC([O-])=O)C[N+](C)(C)C	InChI=1S/C12H19NO6/c1-13(2;3)8-9(7-11(16)17)19-12(18)6-4-5-10(14)15/h4;6;9H;5;7-8H2;1-3H3;(H-;14;15;16;17)/b6-4+;InChI=1S/C12H19NO6/c1-13(2;3)8-9(7-11(16)17)19-12(18)6-4-5-10(14)15/h4;6;9H;5;7-8H2;1-3H3;(H-;14;15;16;17)/b6-4+/t9-/m0/s1	C5:1-DC	Acylcarnitines	[M+H]+	274.1	85.1	60	10	35	15
LMFA07070066; LMFA07070091; LMFA07070072	C12H21NO6	C[N+](C)(C)CC(CC([O-])=O)OC(=O)CCCC(O)=O;C[N+](C)(C)C[C@@H](CC([O-])=O)OC(=O)CCCC(O)=O	InChI=1S/C12H21NO6/c1-13(2;3)8-9(7-11(16)17)19-12(18)6-4-5-10(14)15/h9H;4-8H2;1-3H3;(H-;14;15;16;17);InChI=1S/C12H21NO6/c1-13(2;3)8-9(7-11(16)17)19-12(18)6-4-5-10(14)15/h9H;4-8H2;1-3H3;(H-;14;15;16;17)/t9-/m1/s1	C5-DC (C6-OH)	Acylcarnitines	[M+H]+	276.2	85.1	61	10	35	15
LMFA07070002	C15H29NO4	CCCCCCCC(=O)OC(CC([O-])=O)C[N+](C)(C)C;CCCCCCCC(=O)O[C@@H](CC([O-])=O)C[N+](C)(C)C;CCCCCCCC(=O)O[C@H](CC([O-])=O)C[N+](C)(C)C	InChI=1S/C15H29NO4/c1-5-6-7-8-9-10-15(19)20-13(11-14(17)18)12-16(2;3)4/h13H;5-12H2;1-4H3;InChI=1S/C15H29NO4/c1-5-6-7-8-9-10-15(19)20-13(11-14(17)18)12-16(2;3)4/h13H;5-12H2;1-4H3/t13-/m0/s1;InChI=1S/C15H29NO4/c1-5-6-7-8-9-10-15(19)20-13(11-14(17)18)12-16(2;3)4/h13H;5-12H2;1-4H3/t13-/m1/s1	C8	Acylcarnitines	[M+H]+	288.2	85.1	66	10	33	15
				D3-C8	Internal standard	[M+H]+	291.2	85.1	66	10	33	15
LMFA07070029	C16H31NO4	CC(C)CCCC(C)C(=O)OC(CC([O-])=O)C[N+](C)(C)C;CCCCCCCCC(=O)OC(CC([O-])=O)C[N+](C)(C)C;C[N+](C)(C)CC(CC([O-])=O)OC([*])=O	InChI=1S/C16H31NO4/c1-12(2)8-7-9-13(3)16(20)21-14(10-15(18)19)11-17(4;5)6/h12-14H;7-11H2;1-6H3;InChI=1S/C16H31NO4/c1-5-6-7-8-9-10-11-16(20)21-14(12-15(18)19)13-17(2;3)4/h14H;5-13H2;1-4H3	C9	Acylcarnitines	[M+H]+	302.2	85.1	66	10	39	15
CHEBI:73049	C14H25NO6	C[N+](C)(C)CC(CC([O-])=O)OC(=O)CCCCCC(O)=O;C[N+](C)(C)C[C@@H](CC([O-])=O)OC(=O)CCCCCC(O)=O	InChI=1S/C14H25NO6/c1-15(2;3)10-11(9-13(18)19)21-14(20)8-6-4-5-7-12(16)17/h11H;4-10H2;1-3H3;(H-;16;17;18;19);InChI=1S/C14H25NO6/c1-15(2;3)10-11(9-13(18)19)21-14(20)8-6-4-5-7-12(16)17/h11H;4-10H2;1-3H3;(H-;16;17;18;19)/t11-/m1/s1	C7-DC	Acylcarnitines	[M+H]+	304.2	85.1	66	10	39	15
LMFA07070015	C17H29NO4	CCCCC\C=C/C=C/C(=O)O[C@H](CC([O-])=O)C[N+](C)(C)C;	InChI=1S/C17H29NO4/c1-5-6-7-8-9-10-11-12-17(21)22-15(13-16(19)20)14-18(2;3)4/h9-12;15H;5-8;13-14H2;1-4H3/b10-9-;12-11+/t15-/m1/s1	C10:2	Acylcarnitines	[M+H]+	312.2	85.1	67	10	40	15
LMFA07070048	C17H31NO4	CCCCC\C=C/CCC(=O)OC(CC([O-])=O)C[N+](C)(C)C;C[N+](C)(C)CC(CC([O-])=O)OC(=O)CCCCCCCC=C;C[N+](C)(C)CC(CC([O-])=O)OC([*])=O	InChI=1S/C17H31NO4/c1-5-6-7-8-9-10-11-12-17(21)22-15(13-16(19)20)14-18(2;3)4/h5;15H;1;6-14H2;2-4H3;InChI=1S/C17H31NO4/c1-5-6-7-8-9-10-11-12-17(21)22-15(13-16(19)20)14-18(2;3)4/h9-10;15H;5-8;11-14H2;1-4H3/b10-9-	C10:1	Acylcarnitines	[M+H]+	314.2	85.1	68	10	40	15
LMFA07070006	C17H33NO4	CCCCCCCCCC(=O)OC(CC([O-])=O)C[N+](C)(C)C;O([C@@H](C[N+](C)(C)C)CC([O-])=O)C(CCCCCCCCC)=O	InChI=1S/C17H33NO4/c1-5-6-7-8-9-10-11-12-17(21)22-15(13-16(19)20)14-18(2;3)4/h15H;5-14H2;1-4H3;InChI=1S/C17H33NO4/c1-5-6-7-8-9-10-11-12-17(21)22-15(13-16(19)20)14-18(2;3)4/h15H;5-14H2;1-4H3/t15-/m1/s1	C10	Acylcarnitines	[M+H]+	316.2	85.1	140	10	37	15
				D3-C10	Internal standard	[M+H]+	319.3	85.1	140	10	37	15
	C19H35NO4	CCCCCCCCC\C=C\C(=O)O[C@@H](CCC([O-])=O)[N+](C)(C)C;	InChI=1S/C19H35NO4/c1-5-6-7-8-9-10-11-12-13-14-19(23)24-17(20(2;3)4)15-16-18(21)22/h13-14;17H;5-12;15-16H2;1-4H3/b14-13+/t17-/m0/s1	C12:1	Acylcarnitines	[M+H]+	342.3	85.1	73	10	44	15
LMFA07070062	C19H37NO4	CCCCCCCCCCCC(=O)OC(CC([O-])=O)C[N+](C)(C)C;CCCCCCCCCCCC(=O)O[C@H](CC([O-])=O)C[N+](C)(C)C	InChI=1S/C19H37NO4/c1-5-6-7-8-9-10-11-12-13-14-19(23)24-17(15-18(21)22)16-20(2;3)4/h17H;5-16H2;1-4H3;InChI=1S/C19H37NO4/c1-5-6-7-8-9-10-11-12-13-14-19(23)24-17(15-18(21)22)16-20(2;3)4/h17H;5-16H2;1-4H3/t17-/m1/s1	C12	Acylcarnitines	[M+H]+	344.3	85.1	73	10	44	15
LMFA07070020	C21H37NO4	CCCCCCCC\C=C\C=C\CC(=O)O[C@@H](CC([O-])=O)C[N+](C)(C)C;CCCCC\C=C/C\C=C/CCCC(=O)OC(CC([O-])=O)C[N+](C)(C)C;C[N+](C)(C)CC(CC([O-])=O)OC([*])=O;C[N+](C)(C)C[C@@H](CC([O-])=O)OC([*])=O	InChI=1S/C21H37NO4/c1-5-6-7-8-9-10-11-12-13-14-15-16-21(25)26-19(17-20(23)24)18-22(2;3)4/h12-15;19H;5-11;16-18H2;1-4H3/b13-12+;15-14+/t19-/m0/s1;InChI=1S/C21H37NO4/c1-5-6-7-8-9-10-11-12-13-14-15-16-21(25)26-19(17-20(23)24)18-22(2;3)4/h9-10;12-13;19H;5-8;11;14-18H2;1-4H3/b10-9-;13-12-	C14:2	Acylcarnitines	[M+H]+	368.3	85.1	78	10	47	15
LMFA07070057	C21H39NO4	CCCCCCCCCCCC=CC(=O)OC(CC([O-])=O)C[N+](C)(C)C;CCCCCCCC\C=C/CCCC(=O)OC(CC([O-])=O)C[N+](C)(C)C;C[N+](C)(C)CC(CC([O-])=O)OC([*])=O;C[N+](C)(C)C[C@@H](CC([O-])=O)OC([*])=O;	InChI=1S/C21H39NO4/c1-5-6-7-8-9-10-11-12-13-14-15-16-21(25)26-19(17-20(23)24)18-22(2;3)4/h12-13;19H;5-11;14-18H2;1-4H3/b13-12-;InChI=1S/C21H39NO4/c1-5-6-7-8-9-10-11-12-13-14-15-16-21(25)26-19(17-20(23)24)18-22(2;3)4/h15-16;19H;5-14;17-18H2;1-4H3	C14:1	Acylcarnitines	[M+H]+	370.3	85.1	78	10	47	15
LMFA07070107	C21H41NO4	CCCCCCCCCCCCCC(=O)OC(CC([O-])=O)C[N+](C)(C)C;CCCCCCCCCCCCCC(=O)O[C@H](CC([O-])=O)C[N+](C)(C)C	InChI=1S/C21H41NO4/c1-5-6-7-8-9-10-11-12-13-14-15-16-21(25)26-19(17-20(23)24)18-22(2;3)4/h19H;5-18H2;1-4H3;InChI=1S/C21H41NO4/c1-5-6-7-8-9-10-11-12-13-14-15-16-21(25)26-19(17-20(23)24)18-22(2;3)4/h19H;5-18H2;1-4H3/t19-/m1/s1	C14	Acylcarnitines	[M+H]+	372.3	85.1	86	10	45	15
LMFA07070083	C19H35NO6	C[N+](C)(C)C(CCC([O-])=O)OC(=O)CCCCCCCCCCC(O)=O;C[N+](C)(C)[C@H](CCC([O-])=O)OC(=O)CCCCCCCCCCC(O)=O	InChI=1S/C19H35NO6/c1-20(2;3)16(14-15-18(23)24)26-19(25)13-11-9-7-5-4-6-8-10-12-17(21)22/h16H;4-15H2;1-3H3;(H-;21;22;23;24);InChI=1S/C19H35NO6/c1-20(2;3)16(14-15-18(23)24)26-19(25)13-11-9-7-5-4-6-8-10-12-17(21)22/h16H;4-15H2;1-3H3;(H-;21;22;23;24)/t16-/m0/s1	C12-DC	Acylcarnitines	[M+H]+	374.3	85.1	86	10	45	15
LMFA07070019	C21H37NO5	CCCCC\C=C/C\C=C/CC(O)CC(=O)OC(CC([O-])=O)C[N+](C)(C)C;C[N+](C)(C)CC(CC([O-])=O)OC([*])=O;C[N+](C)(C)C[C@@H](CC([O-])=O)OC([*])=O	InChI=1S/C21H37NO5/c1-5-6-7-8-9-10-11-12-13-14-18(23)15-21(26)27-19(16-20(24)25)17-22(2;3)4/h9-10;12-13;18-19;23H;5-8;11;14-17H2;1-4H3/b10-9-;13-12-	C14:2-OH	Acylcarnitines	[M+H]+	384.3	85.1	81	10	49	15
CHEBI:86067	C21H39NO5	CCCCCCCC\C=C/CC(O)CC(=O)O[C@H](CC([O-])=O)C[N+](C)(C)C;CCCC\C=C/CCCCCC(O)CC(=O)OC(CC([O-])=O)C[N+](C)(C)C;C[N+](C)(C)CC(CC([O-])=O)OC([*])=O	InChI=1S/C21H39NO5/c1-5-6-7-8-9-10-11-12-13-14-18(23)15-21(26)27-19(16-20(24)25)17-22(2;3)4/h12-13;18-19;23H;5-11;14-17H2;1-4H3/b13-12-/t18?;19-/m1/s1;InChI=1S/C21H39NO5/c1-5-6-7-8-9-10-11-12-13-14-18(23)15-21(26)27-19(16-20(24)25)17-22(2;3)4/h8-9;18-19;23H;5-7;10-17H2;1-4H3/b9-8-	C14:1-OH	Acylcarnitines	[M+H]+	386.3	85.1	81	10	50	15
LMFA07070021	C23H41NO4	CCCCC\C=C/C\C=C/CCCCCC(=O)OC(CC([O-])=O)C[N+](C)(C)C;CCC\C=C/C\C=C/CCCCCCCC(=O)O[C@H](CC([O-])=O)C[N+](C)(C)C;C[N+](C)(C)CC(CC([O-])=O)OC([*])=O	InChI=1S/C23H41NO4/c1-5-6-7-8-9-10-11-12-13-14-15-16-17-18-23(27)28-21(19-22(25)26)20-24(2;3)4/h7-8;10-11;21H;5-6;9;12-20H2;1-4H3/b8-7-;11-10-/t21-/m1/s1;InChI=1S/C23H41NO4/c1-5-6-7-8-9-10-11-12-13-14-15-16-17-18-23(27)28-21(19-22(25)26)20-24(2;3)4/h9-10;12-13;21H;5-8;11;14-20H2;1-4H3/b10-9-;13-12-	C16:2	Acylcarnitines	[M+H]+	396.3	85.1	83	10	51	15
LMFA07070109	C23H43NO4	CCCCCCCCCCCCC\C=C\C(=O)OC(CC([O-])=O)C[N+](C)(C)C;CCCCCC\C=C/CCCCCCCC(=O)O[C@H](CC([O-])=O)C[N+](C)(C)C;C[N+](C)(C)CC(CC([O-])=O)OC([*])=O	InChI=1S/C23H43NO4/c1-5-6-7-8-9-10-11-12-13-14-15-16-17-18-23(27)28-21(19-22(25)26)20-24(2;3)4/h10-11;21H;5-9;12-20H2;1-4H3/b11-10-/t21-/m1/s1;InChI=1S/C23H43NO4/c1-5-6-7-8-9-10-11-12-13-14-15-16-17-18-23(27)28-21(19-22(25)26)20-24(2;3)4/h17-18;21H;5-16;19-20H2;1-4H3/b18-17+	C16:1	Acylcarnitines	[M+H]+	398.3	85.1	84	10	51	15
LMFA07070004	C23H45NO4	CCCCCCCCCCCCCCCC(=O)OC(CC([O-])=O)C[N+](C)(C)C;CCCCCCCCCCCCCCCC(=O)O[C@H](CC([O-])=O)C[N+](C)(C)C	InChI=1S/C23H45NO4/c1-5-6-7-8-9-10-11-12-13-14-15-16-17-18-23(27)28-21(19-22(25)26)20-24(2;3)4/h21H;5-20H2;1-4H3;InChI=1S/C23H45NO4/c1-5-6-7-8-9-10-11-12-13-14-15-16-17-18-23(27)28-21(19-22(25)26)20-24(2;3)4/h21H;5-20H2;1-4H3/t21-/m1/s1	C16	Acylcarnitines	[M+H]+	400.3	85.1	84	10	51	15
				D3-C16	Internal standard	[M+H]+	403.3	85.1	84	10	51	15
LMFA07070026	C23H41NO5	CCC\C=C/C\C=C/CCCCCC(O)CC(=O)O[C@@H](CC([O-])=O)C[N+](C)(C)C	InChI=1S/C23H41NO5/c1-5-6-7-8-9-10-11-12-13-14-15-16-20(25)17-23(28)29-21(18-22(26)27)19-24(2;3)4/h7-8;10-11;20-21;25H;5-6;9;12-19H2;1-4H3/b8-7-;11-10-/t20?;21-/m0/s1	C16:2-OH	Acylcarnitines	[M+H]+	412.3	85.1	86	10	53	15
LMFA07070044; LMFA07070067	C23H43NO5	CCCCCC\C=C/CCCCCC(O)CC(=O)O[C@@H](CC([O-])=O)C[N+](C)(C)C;C[N+](C)(C)CC(CC([O-])=O)OC([*])=O;C[N+](C)(C)C[C@@H](CC([O-])=O)OC([*])=O	InChI=1S/C23H43NO5/c1-5-6-7-8-9-10-11-12-13-14-15-16-20(25)17-23(28)29-21(18-22(26)27)19-24(2;3)4/h10-11;20-21;25H;5-9;12-19H2;1-4H3/b11-10-/t20?;21-/m0/s1	C16:1-OH	Acylcarnitines	[M+H]+	414.3	85.1	87	10	53	15
LMFA07010720	C23H45NO4	CCCCCCCCCCCCCC(O)CC(=O)O[C@H](CC([O-])=O)C[N+](C)(C)C	InChI=1S/C23H45NO5/c1-5-6-7-8-9-10-11-12-13-14-15-16-20(25)17-23(28)29-21(18-22(26)27)19-24(2;3)4/h20-21;25H;5-19H2;1-4H3/t20?;21-/m1/s1	C16-OH	Acylcarnitines	[M+H]+	416.3	85.1	87	10	53	15
LMFA07070009	C25H45NO4	CCCCC\C=C/C\C=C/CCCCCCCC(=O)O[C@H](CC(=O)[O-])C[N+](C)(C)C;CCCCC\C=C\C\C=C\CCCCCCCC(=O)OC(CC([O-])=O)C[N+](C)(C)C;C[N+](C)(C)CC(CC([O-])=O)OC([*])=O;C[N+](C)(C)C[C@@H](CC([O-])=O)OC([*])=O	InChI=1S/C25H45NO4/c1-5-6-7-8-9-10-11-12-13-14-15-16-17-18-19-20-25(29)30-23(21-24(27)28)22-26(2;3)4/h9-10;12-13;23H;5-8;11;14-22H2;1-4H3/b10-9+;13-12+;InChI=1S/C25H45NO4/c1-5-6-7-8-9-10-11-12-13-14-15-16-17-18-19-20-25(29)30-23(21-24(27)28)22-26(2;3)4/h9-10;12-13;23H;5-8;11;14-22H2;1-4H3/b10-9-;13-12-/t23-/m1/s1	C18:2	Acylcarnitines	[M+H]+	424.3	85.1	89	10	54	15
LMFA07070063	C25H47NO4	CCCCCCCC\C=C/CCCCCCCC(=O)O[C@H](CC([O-])=O)C[N+](C)(C)C;CCCCCCCC\C=C\CCCCCCCC(=O)OC(CC([O-])=O)C[N+](C)(C)C;CCCCCC\C=C/CCCCCCCCCC(=O)O[C@@H](CC([O-])=O)C[N+](C)(C)C;CCCCCC\C=C\CCCCCCCCCC(=O)O[C@@H](CC([O-])=O)C[N+](C)(C)C;C[N+](C)(C)CC(CC([O-])=O)OC([*])=O	InChI=1S/C25H47NO4/c1-5-6-7-8-9-10-11-12-13-14-15-16-17-18-19-20-25(29)30-23(21-24(27)28)22-26(2;3)4/h10-11;23H;5-9;12-22H2;1-4H3/b11-10+/t23-/m0/s1;InChI=1S/C25H47NO4/c1-5-6-7-8-9-10-11-12-13-14-15-16-17-18-19-20-25(29)30-23(21-24(27)28)22-26(2;3)4/h10-11;23H;5-9;12-22H2;1-4H3/b11-10-/t23-/m0/s1;InChI=1S/C25H47NO4/c1-5-6-7-8-9-10-11-12-13-14-15-16-17-18-19-20-25(29)30-23(21-24(27)28)22-26(2;3)4/…	C18:1	Acylcarnitines	[M+H]+	426.4	85.1	89	10	55	15
LMFA07070008	C25H49NO4	CCCCCCCCCCCCCCCCCC(=O)O[C@H](CC([O-])=O)C[N+](C)(C)C	InChI=1S/C25H49NO4/c1-5-6-7-8-9-10-11-12-13-14-15-16-17-18-19-20-25(29)30-23(21-24(27)28)22-26(2;3)4/h23H;5-22H2;1-4H3/t23-/m1/s1	C18	Acylcarnitines	[M+H]+	428.4	85.1	96	10	63	15
				D3-C18	Internal standard	[M+H]+	431.4	85.1	96	10	63	15
LMFA07070025	C25H47NO5	CCCCCC\C=C/CCCCCCCC(O)CC(=O)O[C@@H](CC([O-])=O)C[N+](C)(C)C	InChI=1S/C25H47NO5/c1-5-6-7-8-9-10-11-12-13-14-15-16-17-18-22(27)19-25(30)31-23(20-24(28)29)21-26(2;3)4/h10-11;22-23;27H;5-9;12-21H2;1-4H3/b11-10-/t22?;23-/m0/s1	C18:1-OH	Acylcarnitines	[M+H]+	442.4	85.1	92	10	57	15
LMFA07070087	C13H23NO6	CC(CC(O)=O)CC(=O)OC(CC([O-])=O)C[N+](C)(C)C;C[N+](C)(C)CC(CC([O-])=O)OC([*])=O	InChI=1S/C13H23NO6/c1-9(5-11(15)16)6-13(19)20-10(7-12(17)18)8-14(2;3)4/h9-10H;5-8H2;1-4H3;(H-;15;16;17;18)	C5-M-DC	Internal standard	[M+H]+	290.2	85.1	63	10	37	15
				13C6-Gluc	Internal standard	[M+H]+	204.13	186.19	140	10	9	15
	C36H72NO8P			PC aa C28:0	Internal standard	[M+H]+	678.5	184	108	10	36	15
	C48H96NO8P			PC aa C40:0	Internal standard	[M+H]+	846.7	184	146	10	48	15
	C29H59N2O6P	[H][C@](/C=C/CCCCCCCCCCCCC)(O)[C@@]([H])(NC(CCCCC)=O)COP([O-])(OCC[N+](C)(C)C)=O	InChI=1S/C29H59N2O6P/c1-6-8-10-11-12-13-14-15-16-17-18-19-21-22-28(32)27(30-29(33)23-20-9-7-2)26-37-38(34,35)36-25-24-31(3,4)5/h21-22,27-28,32H,6-20,23-26H2,1-5H3,(H-,30,33,34,35)/b22-21+/t27-,28+/m0/s1	SM C6:0	Internal standard	[M+H]+	563.4	184	94	10	32	15
LMSD, LIPID MAPS® Structure Database; InChI, International Chemical Identifier; LPC, lysophosphatidylcholine; PC, phosphatidylcholine; O-PC, alkyl-acyl phosphatidylcholines; SM, sphingomyelin.
